# Supplementary material for: Which Seed Properties Determine the Preferences of Carabid Beetle Seed Predators?
Source: PubMed Central journal article supplement (PMC7692740; doi:10.3390/insects11110757), 2020-11-04
Supplement: insects-11-00757-s001.pdf [file insects-11-00757-s001.pdf]

Supplementary materials

**Foffová H., Čavar Zeljković S., Honěk A., Martinkova Z., Tarkowski P., Saska P.:** Which seed properties determine the preferences of carabid beetle seed predators?

Appendix S1

Content tables of results:

|                                                               |       |
|---------------------------------------------------------------|-------|
| Table 1 ( <i>Preferences of carabids</i> ).....               | 1 - 3 |
| Table 2 ( <i>Morphological properties of the seeds</i> )..... | 4     |
| Table 3 ( <i>Surface fatty acids from seeds</i> ).....        | 5 - 6 |
| Table 4 ( <i>Total fatty acids from seeds</i> ).....          | 7 - 8 |
| Table 5 ( <i>Volatiles from imbibed seeds</i> ).....          | 9     |
| Table 6 ( <i>Volatiles from dry seeds</i> ).....              | 10    |
| Table 7 ( <i>Other surface compounds</i> ).....               | 11    |

**Appendix S1: Table 1.** The standardized consumption of 37 carabid species on 28 seed species. The preferences were determined based on a cafeteria experiment described in Honěk et al. [6] and Saska et al. [7].

| Species                                                  | <i>Acupalpus meridianus</i><br>(Linnaeus) | <i>Amara aenea</i> (DeGeer) | <i>Amara anthobia</i> (A. Villa et<br>G.B. Villa) | <i>Amara apricaria</i> (Paykull) | <i>Amara aulica</i> (Panzer) | <i>Amara bifrons</i> (Gyllenhal) | <i>Amara consularis</i><br>(Dufschmid) | <i>Amara convexior</i> (Stephens) | <i>Amara convexiuscula</i><br>(Marsham) | <i>Amara eurynota</i> (Panzer) | <i>Amara familiaris</i><br>(Dufschmid) | <i>Amara ingenua</i><br>(Dufschmid) |
|----------------------------------------------------------|-------------------------------------------|-----------------------------|---------------------------------------------------|----------------------------------|------------------------------|----------------------------------|----------------------------------------|-----------------------------------|-----------------------------------------|--------------------------------|----------------------------------------|-------------------------------------|
| <i>Amaranthus retroflexus</i> L.                         | 0.016                                     | 0.002                       | 0.002                                             | 0                                | 0.065                        | 0.002                            | 0.085                                  | 0.012                             | 0.089                                   | 0.075                          | 0                                      | 0.011                               |
| <i>Arctium lappa</i> L.                                  | 0                                         | 0.003                       | 0                                                 | 0                                | 0.17                         | 0                                | 0.013                                  | 0.003                             | 0.026                                   | 0.005                          | 0                                      | 0.011                               |
| <i>Arenaria serpyllifolia</i> agg.                       | 0.295                                     | 0.508                       | 0.05                                              | 0.006                            | 0.053                        | 0.012                            | 0.039                                  | 0.305                             | 0.04                                    | 0.052                          | 0.4                                    | 0.055                               |
| <i>Bidens tripartita</i> L.                              | 0                                         | 0                           | 0                                                 | 0                                | 0.029                        | 0                                | 0                                      | 0.021                             | 0.092                                   | 0.018                          | 0                                      | 0.075                               |
| <i>Campanula trachelium</i> L.                           | 0.262                                     | 0.444                       | 0.031                                             | 0.175                            | 0.031                        | 0.044                            | 0.876                                  | 0.994                             | 0.322                                   | 0.191                          | 0.103                                  | 0.018                               |
| <i>Capsella bursa-pastoris</i> (L.)<br>Med.              | 0.557                                     | 1                           | 0.565                                             | 0.038                            | 0.033                        | 0.194                            | 0.163                                  | 0.103                             | 0.071                                   | 0.54                           | 0.526                                  | 0.114                               |
| <i>Chenopodium album</i> L.                              | 0                                         | 0                           | 0                                                 | 0                                | 0.01                         | 0                                | 0.007                                  | 0.003                             | 0.106                                   | 0.004                          | 0.002                                  | 0.088                               |
| <i>Cichorium intybus</i> L.                              | 0                                         | 0                           | 0                                                 | 0.031                            | 0.436                        | 0                                | 0.039                                  | 0.015                             | 0.386                                   | 0.107                          | 0.015                                  | 0.471                               |
| <i>Cirsium arvense</i> (L.) Scop.                        | 0.016                                     | 0.022                       | 0.015                                             | 0.319                            | 1                            | 0.021                            | 0.712                                  | 0.032                             | 0.393                                   | 0.263                          | 0.01                                   | 0.713                               |
| <i>Consolida regalis</i> S.F.Gray                        | 0                                         | 0                           | 0                                                 | 0                                | 0.014                        | 0.002                            | 0                                      | 0                                 | 0.087                                   | 0.005                          | 0.01                                   | 0.015                               |
| <i>Crepis biennis</i> L.                                 | 0.016                                     | 0.071                       | 0.015                                             | 0.144                            | 0.031                        | 0.028                            | 0.137                                  | 0.1                               | 0.301                                   | 0.066                          | 0.006                                  | 0.156                               |
| <i>Descurainia sophia</i> (L.)<br>Prantl                 | 0.738                                     | 0.813                       | 0.379                                             | 0                                | 0.065                        | 0.052                            | 0.039                                  | 0.314                             | 0.191                                   | 0.465                          | 0.333                                  | 0.055                               |
| <i>Fumaria officinalis</i> L.                            | 0                                         | 0                           | 0                                                 | 0                                | 0                            | 0                                | 0.007                                  | 0                                 | 0.002                                   | 0.01                           | 0                                      | 0                                   |
| <i>Galinsoga parviflora</i> Cav.                         | 0.098                                     | 0.131                       | 0.042                                             | 0.019                            | 0.043                        | 0.096                            | 0.013                                  | 0.402                             | 0.518                                   | 0.2                            | 0.064                                  | 0.215                               |
| <i>Galium aparine</i> L.                                 | 0                                         | 0                           | 0                                                 | 0.006                            | 0.015                        | 0                                | 0.007                                  | 0.006                             | 0.024                                   | 0                              | 0                                      | 0.002                               |
| <i>Lapsana communis</i> L.                               | 0                                         | 0                           | 0                                                 | 0                                | 0.132                        | 0                                | 0.033                                  | 0.006                             | 0.127                                   | 0.041                          | 0.01                                   | 0.046                               |
| <i>Leonurus cardiaca</i> L.                              | 0                                         | 0                           | 0.003                                             | 0.019                            | 0.065                        | 0.005                            | 0.02                                   | 0.006                             | 0.064                                   | 0.074                          | 0.01                                   | 0.011                               |
| <i>Lepidium ruderales</i> L.                             | 0.459                                     | 0.744                       | 0.421                                             | 0.063                            | 0.01                         | 0.026                            | 0.013                                  | 0.375                             | 0.111                                   | 0.615                          | 0.329                                  | 0.175                               |
| <i>Melilotus albus</i> Med.                              | 0.033                                     | 0                           | 0                                                 | 0.019                            | 0.003                        | 0                                | 0.02                                   | 0.006                             | 0.04                                    | 0.016                          | 0                                      | 0.009                               |
| <i>Potentilla argentea</i> L.                            | 0.066                                     | 0.036                       | 0.009                                             | 0.019                            | 0.024                        | 0.016                            | 0.059                                  | 0.158                             | 0.266                                   | 0.086                          | 0.043                                  | 0.033                               |
| <i>Silene latifolia alba</i> (Mill.)<br>Greut. et Burdet | 0.033                                     | 0.204                       | 0.178                                             | 0.144                            | 0.033                        | 0.023                            | 0.275                                  | 0.179                             | 0.412                                   | 0.295                          | 0.516                                  | 0.441                               |
| <i>Sisymbrium loeselii</i> L.                            | 1                                         | 0.055                       | 0.063                                             | 0                                | 0.07                         | 0.11                             | 0.02                                   | 0.023                             | 0.122                                   | 0.243                          | 0.062                                  | 0.029                               |
| <i>Stellaria media</i> (L.) Vill.                        | 0.033                                     | 0.784                       | 1                                                 | 0.356                            | 0.086                        | 0.061                            | 0.51                                   | 0.094                             | 0.101                                   | 0.517                          | 1                                      | 0.05                                |
| <i>Taraxacum officinale</i> agg.                         | 0.098                                     | 0.907                       | 0.325                                             | 1                                | 0.16                         | 1                                | 1                                      | 0.507                             | 1                                       | 1                              | 0.151                                  | 1                                   |
| <i>Thlapsi arvense</i> L.                                | 0                                         | 0.026                       | 0                                                 | 0.063                            | 0.01                         | 0.009                            | 0.196                                  | 0.073                             | 0.087                                   | 0.373                          | 0.004                                  | 0.044                               |
| <i>Tripleurospermum inodorum</i><br>(L.) Schu.-Bip.      | 0.016                                     | 0.295                       | 0.002                                             | 0                                | 0.149                        | 0.044                            | 0.111                                  | 1                                 | 0.946                                   | 0.532                          | 0.041                                  | 0.743                               |
| <i>Urtica dioica</i> L.                                  | 0.016                                     | 0.043                       | 0.06                                              | 0.006                            | 0.043                        | 0.049                            | 0.078                                  | 0.883                             | 0.32                                    | 0.235                          | 0.118                                  | 0.474                               |
| <i>Viola arvensis</i> Murray                             | 0.016                                     | 0.014                       | 0.003                                             | 0                                | 0.046                        | 0.012                            | 0.124                                  | 0.062                             | 0.278                                   | 0.16                           | 0.004                                  | 0.259                               |

Appendix S1: Table 1. (Continued)

| Species                                                  | <i>Amara litorea</i><br>(C.G.Thomson) | <i>Amara montivaga</i> (Sturm) | <i>Amara ovata</i> (Fabricius) | <i>Amara sabulosa</i> (Audient-Serville) | <i>Amara similata</i> (Gyllenhal) | <i>Amara spreta</i> (Dejean) | <i>Anisodactylus signatus</i> (Panzer) | <i>Calathus ambiguus</i> (Paykull) | <i>Calathus fuscipes</i> (Goeze) | <i>Harpalus affinis</i> (Schrank) | <i>Harpalus atratus</i> (Latreille) | <i>Harpalus distinguendus</i> (Dufschmid) |
|----------------------------------------------------------|---------------------------------------|--------------------------------|--------------------------------|------------------------------------------|-----------------------------------|------------------------------|----------------------------------------|------------------------------------|----------------------------------|-----------------------------------|-------------------------------------|-------------------------------------------|
| <i>Amaranthus retroflexus</i> L.                         | 0.001                                 | 0                              | 0.014                          | 0                                        | 0.01                              | 0                            | 0.285                                  | 0                                  | 0.051                            | 0.206                             | 0.582                               | 0.127                                     |
| <i>Arctium lappa</i> L.                                  | 0.006                                 | 0                              | 0.006                          | 0                                        | 0                                 | 0                            | 0.005                                  | 0                                  | 0                                | 0.022                             | 0.021                               | 0.01                                      |
| <i>Arenaria serpyllifolia</i> agg.                       | 0.061                                 | 0.004                          | 0.086                          | 0.022                                    | 0.41                              | 0.122                        | 0.056                                  | 0.028                              | 0.949                            | 0.037                             | 0.011                               | 0.038                                     |
| <i>Bidens tripartita</i> L.                              | 0.007                                 | 0.003                          | 0                              | 0                                        | 0.003                             | 0.006                        | 0.173                                  | 0                                  | 0                                | 0.087                             | 0                                   | 0.084                                     |
| <i>Campanula trachelium</i> L.                           | 0.45                                  | 0.001                          | 0.044                          | 0.086                                    | 0.608                             | 0.04                         | 0.307                                  | 0                                  | 0.59                             | 0.117                             | 0.073                               | 0.241                                     |
| <i>Capsella bursa-pastoris</i> (L.)<br>Med.              | 0.901                                 | 0.004                          | 0.832                          | 0.129                                    | 0.986                             | 0.627                        | 0.138                                  | 0.222                              | 0.41                             | 0.269                             | 0.201                               | 0.309                                     |
| <i>Chenopodium album</i> L.                              | 0.006                                 | 0                              | 0                              | 0                                        | 0.003                             | 0.005                        | 0.491                                  | 0.028                              | 0                                | 0.128                             | 0.301                               | 0.249                                     |
| <i>Cichorium intybus</i> L.                              | 0.027                                 | 0.017                          | 0.015                          | 0.011                                    | 0.003                             | 0.018                        | 0.853                                  | 0                                  | 0                                | 0.586                             | 0.466                               | 0.446                                     |
| <i>Cirsium arvense</i> (L.) Scop.                        | 0.07                                  | 0.001                          | 0.181                          | 0                                        | 0.039                             | 0.012                        | 0.913                                  | 0                                  | 0.333                            | 0.72                              | 0.655                               | 0.528                                     |
| <i>Consolida regalis</i> S.F.Gray                        | 0.003                                 | 0                              | 0.014                          | 0                                        | 0.004                             | 0.005                        | 0.116                                  | 0.111                              | 0.051                            | 0.093                             | 0.005                               | 0.026                                     |
| <i>Crepis biennis</i> L.                                 | 0.024                                 | 1                              | 0.035                          | 0.113                                    | 0.067                             | 0.075                        | 0.354                                  | 0                                  | 0.026                            | 0.165                             | 0.009                               | 0.203                                     |
| <i>Descurainia sophia</i> (L.) Prantl                    | 0.984                                 | 0.017                          | 0.677                          | 0.108                                    | 0.961                             | 0.786                        | 0.096                                  | 0                                  | 1                                | 0.137                             | 0.089                               | 0.388                                     |
| <i>Fumaria officinalis</i> L.                            | 0                                     | 0                              | 0.012                          | 0                                        | 0                                 | 0                            | 0.023                                  | 0                                  | 0                                | 0.004                             | 0.073                               | 0.003                                     |
| <i>Galinsoga parviflora</i> Cav.                         | 0.109                                 | 0.001                          | 0.039                          | 0.495                                    | 0.09                              | 0.679                        | 0.757                                  | 0.028                              | 0.179                            | 0.269                             | 0.098                               | 0.698                                     |
| <i>Galium aparine</i> L.                                 | 0                                     | 0                              | 0.008                          | 0                                        | 0                                 | 0                            | 0.006                                  | 0                                  | 0.026                            | 0.026                             | 0.009                               | 0.002                                     |
| <i>Lapsana communis</i> L.                               | 0.006                                 | 0.016                          | 0.009                          | 0.027                                    | 0.003                             | 0                            | 0.285                                  | 0                                  | 0                                | 0.113                             | 0.027                               | 0.109                                     |
| <i>Leonurus cardiaca</i> L.                              | 0.016                                 | 0.001                          | 0.027                          | 0                                        | 0.003                             | 0.032                        | 0.406                                  | 0.028                              | 0.282                            | 0.232                             | 0.658                               | 0.219                                     |
| <i>Lepidium ruderales</i> L.                             | 0.648                                 | 0.007                          | 0.472                          | 0.161                                    | 1                                 | 0.299                        | 0.113                                  | 0.361                              | 0.179                            | 0.093                             | 0.176                               | 0.558                                     |
| <i>Melilotus albus</i> Med.                              | 0.001                                 | 0                              | 0.002                          | 0                                        | 0.001                             | 0                            | 0.04                                   | 0.139                              | 0.308                            | 0.033                             | 0.032                               | 0.018                                     |
| <i>Potentilla argentea</i> L.                            | 0.018                                 | 0.001                          | 0.027                          | 0                                        | 0.038                             | 0.012                        | 0.238                                  | 0                                  | 0.282                            | 0.085                             | 0.126                               | 0.114                                     |
| <i>Silene latifolia alba</i> (Mill.)<br>Greut. et Burdet | 0.172                                 | 0.037                          | 0.258                          | 0.022                                    | 0.213                             | 0.215                        | 0.61                                   | 0                                  | 0.077                            | 0.334                             | 0.057                               | 0.533                                     |
| <i>Sisymbrium loeselii</i> L.                            | 0.638                                 | 0.003                          | 0.467                          | 0.005                                    | 0.622                             | 0.072                        | 0.094                                  | 0                                  | 0.026                            | 0.289                             | 0.055                               | 0.048                                     |
| <i>Stellaria media</i> (L.) Vill.                        | 0.256                                 | 0.003                          | 0.428                          | 0.032                                    | 0.856                             | 0.279                        | 0.133                                  | 0                                  | 0.769                            | 0.169                             | 0.418                               | 0.14                                      |
| <i>Taraxacum officinale</i> agg.                         | 0.5                                   | 0.993                          | 1                              | 1                                        | 0.931                             | 1                            | 1                                      | 1                                  | 0.128                            | 0.761                             | 0.057                               | 0.764                                     |
| <i>Thlapsi arvense</i> L.                                | 1                                     | 0.007                          | 0.836                          | 0                                        | 0.699                             | 0.009                        | 0.296                                  | 0                                  | 0.026                            | 0.26                              | 0.103                               | 0.147                                     |
| <i>Tripleurospermum inodorum</i><br>(L.) Schu.-Bip.      | 0.051                                 | 0.053                          | 0.115                          | 0.645                                    | 0.439                             | 0.571                        | 0.757                                  | 0                                  | 0.564                            | 0.805                             | 0.08                                | 1                                         |
| <i>Urtica dioica</i> L.                                  | 0.469                                 | 0.001                          | 0.589                          | 0.048                                    | 0.509                             | 0.133                        | 0.644                                  | 0                                  | 0.026                            | 0.49                              | 0.105                               | 0.526                                     |
| <i>Viola arvensis</i> Murray                             | 0.044                                 | 0.005                          | 0.071                          | 0.016                                    | 0.043                             | 0.023                        | 0.655                                  | 0                                  | 0                                | 1                                 | 1                                   | 0.761                                     |

Appendix S1: Table 1. (Continued)

| Species                                                  | <i>Harpalus honestus</i><br>(Duftschmid) | <i>Harpalus luteicornis</i><br>(Duftschmid) | <i>Harpalus rubripes</i><br>(Duftschmid) | <i>Harpalus signaticornis</i><br>(Duftschmid) | <i>Harpalus subcylindricus</i><br>(Dejean) | <i>Ophonus azureus</i><br>(Fabricius) | <i>Parophonus maculicornis</i><br>(Duftschmid) | <i>Pseudoophonus griseus</i><br>(Panzer) | <i>Pseudoophonus rufipes</i><br>(DeGeer) | <i>Pterostichus melanarius</i><br>(Illiger) | <i>Stenolophus teutonius</i><br>(Schrank) | <i>Trechus quadristriatus</i><br>(Schrank) | <i>Zabrus tenebrioides</i><br>(Goeze) |
|----------------------------------------------------------|------------------------------------------|---------------------------------------------|------------------------------------------|-----------------------------------------------|--------------------------------------------|---------------------------------------|------------------------------------------------|------------------------------------------|------------------------------------------|---------------------------------------------|-------------------------------------------|--------------------------------------------|---------------------------------------|
| <i>Amaranthus retroflexus</i> L.                         | 0.377                                    | 0.035                                       | 0.051                                    | 0.052                                         | 0.119                                      | 0                                     | 0.011                                          | 0.798                                    | 0.42                                     | 0.08                                        | 0                                         | 0                                          | 0.003                                 |
| <i>Arctium lappa</i> L.                                  | 0.014                                    | 0                                           | 0.004                                    | 0                                             | 0                                          | 0                                     | 0                                              | 0.003                                    | 0.058                                    | 0.025                                       | 0                                         | 0                                          | 0.006                                 |
| <i>Arenaria serpyllifolia</i> agg.                       | 0.114                                    | 0.058                                       | 0.011                                    | 0.194                                         | 0.129                                      | 0                                     | 0.193                                          | 0.059                                    | 0.01                                     | 0.012                                       | 0.66                                      | 0.079                                      | 0.058                                 |
| <i>Bidens tripartita</i> L.                              | 0                                        | 0.006                                       | 0.056                                    | 0.002                                         | 0                                          | 0                                     | 0                                              | 0.006                                    | 0.066                                    | 0.056                                       | 0.005                                     | 0                                          | 0.108                                 |
| <i>Campanula trachelium</i> L.                           | 0.18                                     | 0.099                                       | 0.103                                    | 0.12                                          | 0.465                                      | 0.061                                 | 0.239                                          | 0.354                                    | 0.082                                    | 0.123                                       | 0.447                                     | 0.079                                      | 0.006                                 |
| <i>Capsella bursa-pastoris</i> (L.)<br>Med.              | 0.474                                    | 0.362                                       | 0.027                                    | 0.442                                         | 0.505                                      | 0.182                                 | 0.091                                          | 0.156                                    | 0.129                                    | 0.037                                       | 1                                         | 1                                          | 0.02                                  |
| <i>Chenopodium album</i> L.                              | 0.054                                    | 0.061                                       | 0.458                                    | 0.014                                         | 0                                          | 0.045                                 | 0                                              | 0.445                                    | 0.256                                    | 0.056                                       | 0                                         | 0                                          | 0.024                                 |
| <i>Cichorium intybus</i> L.                              | 0.106                                    | 0.076                                       | 1                                        | 0.056                                         | 0.035                                      | 0.015                                 | 0                                              | 0.522                                    | 0.908                                    | 0.049                                       | 0                                         | 0                                          | 0.406                                 |
| <i>Cirsium arvense</i> (L.) Scop.                        | 0.64                                     | 0.434                                       | 0.658                                    | 0.192                                         | 0.04                                       | 0.258                                 | 0                                              | 0.739                                    | 1                                        | 1                                           | 0                                         | 0                                          | 0.187                                 |
| <i>Consolida regalis</i> S.F.Gray                        | 0.003                                    | 0                                           | 0.004                                    | 0.025                                         | 0                                          | 0                                     | 0                                              | 0.023                                    | 0.05                                     | 0.049                                       | 0                                         | 0                                          | 0.055                                 |
| <i>Crepis biennis</i> L.                                 | 0.023                                    | 0.283                                       | 0.1                                      | 0.047                                         | 0.193                                      | 0                                     | 0                                              | 0.029                                    | 0.043                                    | 0.216                                       | 0                                         | 0                                          | 0.265                                 |
| <i>Descurainia sophia</i> (L.)<br>Prantl                 | 0.217                                    | 0.152                                       | 0.051                                    | 0.33                                          | 1                                          | 0.212                                 | 0.67                                           | 0.304                                    | 0.045                                    | 0.006                                       | 0.699                                     | 0.19                                       | 0.011                                 |
| <i>Fumaria officinalis</i> L.                            | 0.023                                    | 0                                           | 0.208                                    | 0                                             | 0                                          | 0                                     | 0                                              | 0.046                                    | 0.042                                    | 0.031                                       | 0                                         | 0                                          | 0.004                                 |
| <i>Galinsoga parviflora</i> Cav.                         | 0.209                                    | 0.329                                       | 0.241                                    | 0.53                                          | 0.832                                      | 0.061                                 | 1                                              | 0.933                                    | 0.169                                    | 0.074                                       | 0.316                                     | 0                                          | 0.034                                 |
| <i>Galium aparine</i> L.                                 | 0.003                                    | 0                                           | 0.002                                    | 0.002                                         | 0                                          | 1                                     | 0                                              | 0.003                                    | 0.006                                    | 0.006                                       | 0                                         | 0                                          | 0.001                                 |
| <i>Lapsana communis</i> L.                               | 0.023                                    | 0.073                                       | 0.011                                    | 0.018                                         | 0.015                                      | 0                                     | 0                                              | 0.042                                    | 0.056                                    | 0.093                                       | 0                                         | 0                                          | 0.035                                 |
| <i>Leonurus cardiaca</i> L.                              | 0.463                                    | 0.12                                        | 0.076                                    | 0.072                                         | 0.074                                      | 0                                     | 0                                              | 0.214                                    | 0.127                                    | 0.012                                       | 0.005                                     | 0                                          | 0.041                                 |
| <i>Lepidium ruderales</i> L.                             | 0.28                                     | 0.146                                       | 0.069                                    | 0.174                                         | 0.282                                      | 0.015                                 | 0.511                                          | 0.488                                    | 0.069                                    | 0.019                                       | 0.49                                      | 0.444                                      | 0.02                                  |
| <i>Melilotus albus</i> Med.                              | 0.037                                    | 0                                           | 0.422                                    | 0                                             | 0                                          | 0.045                                 | 0                                              | 0.118                                    | 0.089                                    | 0.006                                       | 0                                         | 0                                          | 0.003                                 |
| <i>Potentilla argentea</i> L.                            | 0.054                                    | 0.108                                       | 0.123                                    | 0.223                                         | 0.089                                      | 0.015                                 | 0.17                                           | 0.71                                     | 0.027                                    | 0.006                                       | 0.34                                      | 0                                          | 0.01                                  |
| <i>Silene latifolia alba</i> (Mill.)<br>Greut. et Burdet | 0.074                                    | 0.303                                       | 0.107                                    | 0.072                                         | 0.02                                       | 0.121                                 | 0.125                                          | 0.257                                    | 0.227                                    | 0.025                                       | 0.117                                     | 0                                          | 0.579                                 |
| <i>Sisymbrium loeselii</i> L.                            | 0.071                                    | 0.076                                       | 0                                        | 0.104                                         | 0.743                                      | 0.136                                 | 0.034                                          | 0.042                                    | 0.082                                    | 0.062                                       | 0.141                                     | 0.841                                      | 0                                     |
| <i>Stellaria media</i> (L.) Vill.                        | 0.503                                    | 0.163                                       | 0.132                                    | 0.12                                          | 0.114                                      | 0.015                                 | 0.193                                          | 0.08                                     | 0.072                                    | 0.074                                       | 0.505                                     | 0.032                                      | 0.03                                  |
| <i>Taraxacum officinale</i> agg.                         | 0.114                                    | 0.589                                       | 0.353                                    | 0.454                                         | 0.698                                      | 0.061                                 | 0.341                                          | 0.323                                    | 0.303                                    | 0.278                                       | 0.16                                      | 0                                          | 1                                     |
| <i>Thlapsi arvense</i> L.                                | 0.037                                    | 0.07                                        | 0.027                                    | 0.126                                         | 0.01                                       | 0.273                                 | 0.023                                          | 0.088                                    | 0.156                                    | 0.012                                       | 0                                         | 0                                          | 0.122                                 |
| <i>Tripleurospermum inodorum</i><br>(L.) Schu.-Bip.      | 0.2                                      | 0.245                                       | 0.241                                    | 0.196                                         | 0.619                                      | 0.758                                 | 0                                              | 0.063                                    | 0.201                                    | 0                                           | 0.029                                     | 0                                          | 0.267                                 |
| <i>Urtica dioica</i> L.                                  | 0.309                                    | 0.198                                       | 0.158                                    | 0.151                                         | 0.609                                      | 0                                     | 0.432                                          | 0.971                                    | 0.573                                    | 0.062                                       | 0.388                                     | 0.048                                      | 0.011                                 |
| <i>Viola arvensis</i> Murray                             | 1                                        | 1                                           | 0.967                                    | 1                                             | 0.743                                      | 0.015                                 | 0.159                                          | 1                                        | 0.995                                    | 0.315                                       | 0.019                                     | 0                                          | 0.003                                 |

**Appendix S1: Table 2.** The morphological properties of the seeds used in preference experiment. Botanical nomenclature is based on Kubát et al. [58]. Classification of plant strategy (A - annual, B - biennial, A-B - annual or biennial, P – perennial plants) is based on Bojnanský and Fargašová [63]. The mass of the seeds is based on measurements of 100 seeds. Indexes of seed shape are based on Cerda et al. [59] and Bekker et al. [38]. The variation between mechanical defence in coat strength and seed coat thickness.

| Species                                               | Strategy | Mass [g] | A [mm]      | B [mm]      | C [mm]      | Shape index | Flatness index | Excentricity index | Volume       | Seed strength [N] | Seed coat thickness [mm] |
|-------------------------------------------------------|----------|----------|-------------|-------------|-------------|-------------|----------------|--------------------|--------------|-------------------|--------------------------|
| <i>Amaranthus retroflexus</i> L.                      | A        | 0.53     | 1.172±0.118 | 0.984±0.079 | 0.63±0.053  | 0.037±0.002 | 1.712±0.041    | 1.19±0.025         | 0.741±0.09   | 19.95±1.299       | 0.048±0.005              |
| <i>Arctium lappa</i> L.                               | B        | 8.72     | 5.63±0.028  | 2.308±0.23  | 1.302±0.035 | 0.108±0.002 | 3.05±0.059     | 2.466±0.134        | 16.932±0.926 | 53.67±15.61       | 0.134±0.069              |
| <i>Arenaria serpyllifolia</i> agg.                    | A-B      | 0.05     | 0.552±0.116 | 0.39±0.041  | 0.272±0.372 | 0.045±0.01  | 1.737±0.097    | 1.451±0.224        | 0.058±0.006  | 4.86±0.518        | 0.138±0.043              |
| <i>Bidens tripartita</i> L.                           | A        | 2.69     | 9.076±1.264 | 2.036±0.131 | 0.414±0.043 | 0.171±0.002 | 13.496±0.73    | 4.47±0.313         | 7.698±0.842  | 13.43±1.268       | 0.076±0.01               |
| <i>Campanula trachelium</i> L.                        | A-B      | 0.18     | 1.188±0.056 | 0.618±0.06  | 0.294±0.055 | 0.097±0.003 | 3.089±0.131    | 1.935±0.077        | 0.217±0.019  | 1.5±0.755         | 0.037±0.002              |
| <i>Capsella bursa-pastoris</i> (L.) Med.              | A-B      | 0.23     | 1.09±0.047  | 0.59±0.067  | 0.41±0.065  | 0.071±0.006 | 2.097±0.166    | 1.87±0.107         | 0.268±0.037  | 1.84±0.533        | 0.019±0.004              |
| <i>Cichorium intybus</i> L.                           | P        | 1.09     | 2.532±0.124 | 1.21±0.057  | 0.572±0.134 | 0.104±0.004 | 3.352±0.253    | 2.094±0.042        | 1.765±0.196  | 7.83±3.693        | 0.069±0.016              |
| <i>Cirsium arvense</i> (L.) Scop.                     | P        | 0.79     | 2.824±0.086 | 1.084±0.065 | 0.572±0.045 | 0.117±0.002 | 3.43±0.096     | 2.612±0.064        | 1.761±0.132  | 6.85±1.708        | 0.081±0.012              |
| <i>Consolida regalis</i> S.F.Gray                     | A        | 1.38     | 1.93±0.155  | 1.164±0.114 | 1.04±0.216  | 0.042±0.006 | 1.499±0.076    | 1.674±0.101        | 2.354±0.229  | 6.85±1.388        | 0.027±0.004              |
| <i>Crepis biennis</i> L.                              | B        | 0.67     | 4.17±0.495  | 0.66±0.036  | 0.572±0.028 | 0.161±0.003 | 4.237±0.265    | 6.319±0.322        | 1.576±0.123  | 5.35±1.363        | 0.044±0.01               |
| <i>Descurainia sophia</i> (L.) Prantl                 | A        | 0.11     | 0.792±0.074 | 0.4±0.067   | 0.364±0.089 | 0.061±0.007 | 1.637±0.029    | 2.032±0.194        | 0.117±0.017  | 1.55±0.201        | 0.045±0.008              |
| <i>Fumaria officinalis</i> L.                         | A        | 3.01     | 1.694±0.116 | 1.572±0.043 | 1.434±0.072 | 0.005±0.003 | 1.144±0.052    | 1.077±0.032        | 3.81±0.11    | 4.23±1.134        | 0.121±0.011              |
| <i>Galinsoga parviflora</i> Cav.                      | A        | 0.17     | 1.658±0.289 | 0.524±0.144 | 0.35±0.418  | 0.123±0.009 | 3.203±0.232    | 3.334±0.404        | 0.331±0.092  | 1.86±0.463        | 0.029±0.003              |
| <i>Galium aparine</i> L.                              | A        | 6.64     | 2.886±0.262 | 2.578±0.332 | 1.688±0.281 | 0.032±0.004 | 1.634±0.065    | 1.125±0.029        | 13.096±2.503 | 99.47±16.818      | 0.017±0.006              |
| <i>Chenopodium album</i> L.                           | A        | 0.7      | 1.24±0.048  | 1.17±0.045  | 0.628±0.304 | 0.049±0.002 | 1.922±0.032    | 1.06±0.019         | 0.915±0.054  | 17.39±3.75        | 0.078±0.016              |
| <i>Lapsana communis</i> L.                            | A        | 1.38     | 3.47±0.118  | 1.04±0.12   | 0.506±0.101 | 0.138±0.005 | 4.648±0.496    | 3.391±0.24         | 1.824±0.214  | 14.83±1.812       | 0.099±0.006              |
| <i>Leonurus cardiaca</i> L.                           | P        | 0.64     | 2.264±0.196 | 1.398±0.058 | 0.816±0.137 | 0.069±0.004 | 2.262±0.098    | 1.617±0.047        | 2.614±0.272  | 3.35±1.112        | 0.065±0.008              |
| <i>Lepidium ruderales</i> L.                          | A-B      | 0.21     | 1.55±0.123  | 1.2±0.12    | 0.412±0.026 | 0.095±0.003 | 3.34±0.114     | 1.297±0.045        | 0.775±0.08   | 7.34±3.007        | 0.062±0.004              |
| <i>Melilotus albus</i> Med.                           | P        | 0.79     | 1.942±0.09  | 1.454±0.103 | 1.006±0.105 | 0.039±0.004 | 1.7±0.067      | 1.339±0.03         | 2.872±0.298  | 29.97±5.77        | 0.061±0.01               |
| <i>Potentilla argentea</i> L.                         | P        | 0.08     | 1.178±0.121 | 0.948±0.061 | 0.756±0.152 | 0.023±0.002 | 1.412±0.039    | 1.249±0.084        | 0.85±0.083   | 1.53±0.269        | 0.079±0.016              |
| <i>Silene latifolia alba</i> (Mill.) Greut. et Burdet | A-B      | 1.81     | 0.796±0.046 | 0.682±0.023 | 0.598±0.118 | 0.012±0.003 | 1.246±0.058    | 1.167±0.025        | 0.326±0.023  | 29.59±5.234       | 0.042±0.007              |
| <i>Sisymbrium loeselii</i> L.                         | A-B      | 0.08     | 0.99±0.206  | 0.572±0.079 | 0.466±0.021 | 0.052±0.013 | 1.684±0.128    | 1.788±0.28         | 0.261±0.027  | 1.16±0.484        | 0.02±0.003               |
| <i>Stellaria media</i> (L.) Vill.                     | A-B      | 0.42     | 1.05±0.035  | 1.02±0.037  | 0.626±0.063 | 0.034±0.002 | 1.655±0.034    | 1.03±0.012         | 0.672±0.031  | 17.52±3.049       | 0.035±0.008              |
| <i>Taraxacum officinale</i> agg.                      | P        | 0.48     | 2.88±0.266  | 0.916±0.064 | 0.322±0.067 | 0.144±0.003 | 6.094±0.517    | 3.168±0.213        | 0.862±0.124  | 1.3±0.621         | 0.067±0.017              |
| <i>Thlapsi arvense</i> L.                             | A-B      | 0.97     | 2.052±0.182 | 1.392±0.132 | 0.748±0.182 | 0.068±0.004 | 2.32±0.097     | 1.478±0.043        | 2.185±0.282  | 11.53±2.265       | 0.04±0.003               |
| <i>Tripleurospermum inodorum</i> (L.) Schultz-Bip.    | A        | 0.32     | 1.89±0.036  | 0.708±0.072 | 0.626±0.055 | 0.094±0.004 | 2.089±0.088    | 2.695±0.129        | 0.842±0.073  | 5.89±1.527        | 0.048±0.003              |
| <i>Urtica dioica</i> L.                               | P        | 0.14     | 1.18±0.094  | 0.76±0.043  | 0.368±0.128 | 0.079±0.002 | 2.649±0.088    | 1.552±0.041        | 0.334±0.034  | 1.14±0.533        | 0.056±0.021              |
| <i>Viola arvensis</i> Murray                          | A        | 0.46     | 1.572±0.099 | 0.92±0.08   | 0.826±0.062 | 0.045±0.005 | 1.515±0.065    | 1.717±0.067        | 1.203±0.109  | 2.49±0.601        | 0.049±0.006              |

**Appendix S1: Table 3.** The amount of total fatty acids. The fatty acids were isolated and derivatized into corresponding volatile methyl esters and then quantified via GC-MS method. The highest content of fatty acids was found in the seeds of *G. parviflora* (467.75±8.40 mg/g<sub>DW</sub>), while the smallest was in the seeds of *G. aparine* (33.39 ±1.26 mg/g<sub>DW</sub>). The major fatty acid in all seeds analyzed was unsaturated linoleic acid, which amount comprised ~50% of total fatty acids quantified.

| Species                                               | Octanoic        | Decanoic        | Undecanoic      | Dodecanoic      | Myristoleic     | Tetradecanoic   | cis-10-Pentadecanoic | Pentadecanoic   | Palmitoleic      | Hexadecanoic     | cis-10-Heptadecenoic | Heptadecanoic   | gamma-Linolenic | Linoleic           | cis-Oleic          | Linoleic         |
|-------------------------------------------------------|-----------------|-----------------|-----------------|-----------------|-----------------|-----------------|----------------------|-----------------|------------------|------------------|----------------------|-----------------|-----------------|--------------------|--------------------|------------------|
| <i>Amaranthus retroflexus</i> L.                      | n.d.            | n.d.            | n.d.            | n.d.            | n.d.            | 0.512±<br>0.043 | n.d.                 | 0.3±<br>0.026   | n.d.             | 5.342±<br>0.147  | 0.291±<br>0.019      | 0.314±<br>0.014 | n.d.            | 27.213±<br>1.164   | 6.921±<br>0.205    | 1.796±<br>0.161  |
| <i>Arctium lappa</i> L.                               | n.d.            | n.d.            | n.d.            | n.d.            | n.d.            | 0.522±<br>0.024 | n.d.                 | 0.308±<br>0.021 | 4.945±<br>0.278  | 7.893±<br>0.222  | 0.33±<br>0.01        | 0.323±<br>0.038 | n.d.            | 98.656±<br>2.823   | 45.747±<br>1.136   | 24.524±<br>1.941 |
| <i>Arenaria serpyllifolia</i> agg.                    | n.d.            | n.d.            | n.d.            | 0.4±<br>0.009   | n.d.            | 0.452±<br>0.025 | n.d.                 | 0.291±<br>0.016 | 0.447±<br>0.047  | 9.666±<br>0.562  | 0.304±<br>0.022      | 0.385±<br>0.019 | 7.88±<br>0.209  | 24.232±<br>0.776   | 5.45±<br>0.235     | n.d.             |
| <i>Bidens tripartita</i> L.                           | n.d.            | n.d.            | n.d.            | n.d.            | 0.613±<br>0.006 | 0.608±<br>0.045 | 0.295±<br>0.008      | 0.313±<br>0.023 | 1.222±<br>0.058  | 17.395±<br>0.478 | 0.54±<br>0.052       | 0.534±<br>0.068 | n.d.            | 113.045±<br>2.981  | 50.948±<br>0.292   | 49.219±<br>2.181 |
| <i>Campanula trachelium</i> L.                        | n.d.            | n.d.            | n.d.            | n.d.            | n.d.            | 0.559±<br>0.022 | 0.309±<br>0.01       | 0.324±<br>0.005 | 12.367±<br>0.357 | 18.169±<br>0.572 | 0.332±<br>0.029      | 0.448±<br>0.047 | n.d.            | 165.164±<br>2.715  | 20.511±<br>1.764   | 75.292±<br>0.743 |
| <i>Capsella bursa-pastoris</i> (L.) Med.              | n.d.            | 0.4±<br>0.02    | n.d.            | 0.451±<br>0.03  | 0.623±<br>0.025 | 1.3±<br>0.02    | n.d.                 | 0.333±<br>0.014 | 0.817±<br>0.02   | 23.258±<br>0.88  | 0.51±<br>0.142       | 0.567±<br>0.065 | n.d.            | 69.437±<br>0.57    | 32.964±<br>0.837   | 12.787±<br>0.857 |
| <i>Chenopodium album</i> L.                           | n.d.            | 0.353±<br>0.005 | n.d.            | 0.406±<br>0.016 | n.d.            | 1.607±<br>0.042 | n.d.                 | 0.703±<br>0.031 | 11.102±<br>0.467 | 15.07±<br>0.2    | 0.338±<br>0.007      | 0.87±<br>0.046  | n.d.            | 128.649±<br>3.382  | 57.327±<br>1.496   | 57.812±<br>2.537 |
| <i>Cichorium intybus</i> L.                           | n.d.            | n.d.            | n.d.            | 0.363±<br>0.015 | n.d.            | n.d.            | 0.473±<br>0.046      | 0.213±<br>0.015 | 0.64±<br>0.017   | 4.005±<br>0.114  | 0.214±<br>0.032      | 0.254±<br>0.008 | 0.787±<br>0.071 | 21.084±<br>0.959   | 24.176±<br>0.325   | 6.274±<br>0.264  |
| <i>Cirsium arvense</i> (L.) Scop.                     | n.d.            | n.d.            | n.d.            | n.d.            | 0.83±<br>0.026  | 1.29±<br>0.07   | n.d.                 | 0.397±<br>0.015 | n.d.             | 3.473±<br>0.115  | n.d.                 | 0.523±<br>0.015 | 0.773±<br>0.031 | 44.39±<br>2.052    | 9.853±<br>0.862    | 5.51±<br>0.574   |
| <i>Consolida regalis</i> S.F.Gray                     | 0.302±<br>0.018 | 0.33±<br>0.026  | n.d.            | 0.345±<br>0.023 | n.d.            | 0.5±<br>0.009   | 0.138±<br>0.106      | 0.286±<br>0.031 | 0.698±<br>0.016  | 20.22±<br>0.486  | 16.317±<br>0.477     | 0.482±<br>0.016 | n.d.            | 64.937±<br>2.034   | 28.767±<br>1.042   | 28.722±<br>1.718 |
| <i>Crepis biennis</i> L.                              | n.d.            | n.d.            | n.d.            | 0.422±<br>0.026 | n.d.            | 0.566±<br>0.05  | 0.221±<br>0.031      | 0.28±<br>0.02   | 0.673±<br>0.062  | 13.479±<br>0.585 | 2.481±<br>0.25       | 0.299±<br>0.08  | n.d.            | 57±<br>1.361       | 26.781±<br>2.168   | 26.023±<br>1.657 |
| <i>Descurainia sophia</i> (L.) Prantl                 | n.d.            | n.d.            | n.d.            | 0.43±<br>0.01   | n.d.            | 0.528±<br>0.023 | 0.303±<br>0.012      | 0.308±<br>0.011 | 18.041±<br>0.864 | 24.663±<br>1.436 | n.d.                 | 0.827±<br>0.076 | n.d.            | 237.369±<br>3.282  | 118.494±<br>12.376 | 52.98±<br>3.106  |
| <i>Fumaria officinalis</i> L.                         | n.d.            | n.d.            | n.d.            | 0.41±<br>0.418  | n.d.            | 0.66±<br>0.667  | n.d.                 | 0.31±<br>0.299  | 0.63±<br>0.643   | 3.14±<br>3.386   | 0.32±<br>0.301       | 0.32±<br>0.306  | n.d.            | 3.54±<br>3.546     | 12.32±<br>13.708   | 4.32±<br>4.266   |
| <i>Galinsoga parviflora</i> Cav.                      | n.d.            | n.d.            | n.d.            | n.d.            | n.d.            | 0.471±<br>0.028 | n.d.                 | 0.301±<br>0.018 | 0.543±<br>0.068  | 5.265±<br>0.247  | 0.317±<br>0.021      | 0.345±<br>0.058 | n.d.            | 34.004±<br>1.89    | 9.411±<br>0.169    | 3.529±<br>0.292  |
| <i>Galium aparine</i> L.                              | n.d.            | n.d.            | n.d.            | 0.423±<br>0.025 | n.d.            | 1.053±<br>0.085 | 0.68±<br>0.036       | 0.737±<br>0.133 | 0.64±<br>0.036   | 6.814±<br>0.236  | 0.284±<br>0.025      | 0.657±<br>0.023 | n.d.            | 89.717±<br>2.838   | 40.221±<br>1.539   | 37.859±<br>2.304 |
| <i>Lapsana communis</i> L.                            | n.d.            | n.d.            | n.d.            | n.d.            | n.d.            | 0.5±<br>0.035   | 0.293±<br>0.021      | 0.667±<br>0.015 | 3.352±<br>0.085  | 5.177±<br>0.092  | n.d.                 | 0.359±<br>0.047 | n.d.            | 31.518±<br>1.293   | 8.308±<br>0.344    | 3.898±<br>0.063  |
| <i>Leonurus cardiaca</i> L.                           | 0.33±<br>0.335  | n.d.            | n.d.            | 0.49±<br>0.471  | n.d.            | 0.76±<br>0.703  | 0.24±<br>0.238       | 0.27±<br>0.272  | 0.62±<br>0.571   | 11.85±<br>12.022 | 1.86±<br>1.703       | 0.5±<br>0.496   | n.d.            | 148.42±<br>150.243 | 66.74±<br>67.122   | 19.22±<br>19.198 |
| <i>Lepidium ruderales</i> L.                          | n.d.            | n.d.            | n.d.            | 0.416±<br>0.015 | n.d.            | 0.618±<br>0.03  | n.d.                 | 0.335±<br>0.061 | 0.463±<br>0.012  | 10.81±<br>0.19   | 0.31±<br>0.018       | 0.557±<br>0.136 | n.d.            | 34.806±<br>0.247   | 16.488±<br>0.305   | 15.828±<br>0.292 |
| <i>Melilotus albus</i> Med.                           | n.d.            | n.d.            | n.d.            | 0.379±<br>0.019 | n.d.            | 0.434±<br>0.021 | n.d.                 | 0.313±<br>0.097 | 4.224±<br>0.287  | 6.457±<br>0.294  | n.d.                 | 0.324±<br>0.005 | n.d.            | 29.913±<br>1.672   | 11.013±<br>0.729   | 5.636±<br>0.279  |
| <i>Potentilla argentea</i> L.                         | n.d.            | n.d.            | n.d.            | 0.448±<br>0.04  | n.d.            | 0.405±<br>0.027 | 0.245±<br>0.023      | 0.28±<br>0.02   | 5.41±<br>0.276   | 8.253±<br>0.11   | n.d.                 | 0.396±<br>0.015 | n.d.            | 55.265±<br>1.251   | 25.112±<br>0.646   | 24.398±<br>1.449 |
| <i>Silene latifolia alba</i> (Mill.) Greut. et Burdet | n.d.            | n.d.            | n.d.            | n.d.            | n.d.            | 0.557±<br>0.097 | 0.24±<br>0.026       | 0.57±<br>0.01   | 3.383±<br>0.146  | 4.843±<br>0.175  | 1.687±<br>0.031      | 0.337±<br>0.04  | n.d.            | 27.085±<br>0.783   | 4.731±<br>0.064    | 1.42±<br>0.062   |
| <i>Sisymbrium loeselii</i> L.                         | n.d.            | n.d.            | n.d.            | n.d.            | n.d.            | 0.746±<br>0.008 | 0.299±<br>0.009      | 0.57±<br>0.01   | 2.473±<br>0.112  | 3.307±<br>0.463  | 1.687±<br>0.031      | 0.337±<br>0.04  | n.d.            | 24.38±<br>0.712    | 6.731±<br>0.064    | 1.42±<br>0.062   |
| <i>Stellaria media</i> (L.) Vill.                     | n.d.            | n.d.            | n.d.            | 0.412±<br>0.021 | n.d.            | 1.627±<br>0.059 | n.d.                 | 0.295±<br>0.028 | n.d.             | 7.237±<br>0.121  | n.d.                 | 0.259±<br>0.038 | 4.89±<br>0.208  | 13.886±<br>0.558   | 3.888±<br>0.263    | 1.125±<br>0.1    |
| <i>Taraxacum officinale</i> agg.                      | n.d.            | n.d.            | n.d.            | n.d.            | n.d.            | 0.528±<br>0.028 | 0.23±<br>0.03        | 0.295±<br>0.009 | 6.446±<br>0.576  | 8.474±<br>0.255  | n.d.                 | 0.354±<br>0.007 | 5.338±<br>0.715 | 60.816±<br>1.595   | 28.427±<br>0.215   | 25.012±<br>3.005 |
| <i>Thlapsi arvense</i> L.                             | n.d.            | 0.415±<br>0.008 | n.d.            | 0.498±<br>0.023 | 0.293±<br>0.021 | 0.577±<br>0.04  | n.d.                 | 0.667±<br>0.061 | 0.4±<br>0.077    | 6.704±<br>0.281  | n.d.                 | 0.322±<br>0.004 | n.d.            | 38.634±<br>1.943   | 16.879±<br>1.414   | 16.523±<br>2.015 |
| <i>Tripleurospermum inodorum</i> (L.) Schultz-Bip.    | n.d.            | n.d.            | 0.243±<br>0.012 | n.d.            | n.d.            | 1.533±<br>0.051 | n.d.                 | 0.276±<br>0.012 | 0.677±<br>0.031  | 7.162±<br>0.243  | n.d.                 | 0.336±<br>0.005 | n.d.            | 60.604±<br>1.682   | 29.196±<br>0.792   | n.d.             |
| <i>Urtica dioica</i> L.                               | n.d.            | n.d.            | n.d.            | n.d.            | n.d.            | 1.569±<br>0.127 | n.d.                 | 0.279±<br>0.028 | 0.284±<br>0.04   | 2.796±<br>0.186  | 0.305±<br>0.005      | 0.316±<br>0.029 | n.d.            | 53.398±<br>2.272   | 5.597±<br>0.536    | 1.49±<br>0.053   |
| <i>Viola arvensis</i> Murray                          | 0.304±<br>0.019 | n.d.            | n.d.            | 0.348±<br>0.016 | n.d.            | 1.517±<br>0.038 | n.d.                 | 0.233±<br>0.005 | 0.731±<br>0.045  | 17.829±<br>0.427 | 0.807±<br>0.023      | 0.763±<br>0.015 | n.d.            | 118.455±<br>2.021  | 53.832±<br>1.243   | 53.074±<br>1.409 |

Appendix S1: Table 3. (Continued)

| Species                                                  | trans-Elaidic    | Stearic          | cis-5,8,11,14-Eicosatetraenoic | cis-5,8,11,14,17-Eicosapentanoic | cis-8,11,14-Eicosatrienoic | cis-11,14-Eicosadienoic | cis-11-Eicosenoic | Eicosanoic      | Heneicosanoic   | cis-4,7,10,13,16,19-Docosahexaenoic | cis-13,16-Docosadienoic | Erucic           | Docosanoic      | Tricosanoic     | cis-15-Tetracosenoic | Tetracosanoic   |
|----------------------------------------------------------|------------------|------------------|--------------------------------|----------------------------------|----------------------------|-------------------------|-------------------|-----------------|-----------------|-------------------------------------|-------------------------|------------------|-----------------|-----------------|----------------------|-----------------|
| <i>Amaranthus retroflexus</i> L.                         | n.d.             | 1.388±<br>0.064  | n.d.                           | n.d.                             | 0.352±<br>0.019            | n.d.                    | 0.76±<br>0.09     | 0.748±<br>0.02  | n.d.            | n.d.                                | n.d.                    | 0.425±<br>0.014  | 0.611±<br>0.01  | 0.347±<br>0.015 | n.d.                 | n.d.            |
| <i>Arctium lappa</i> L.                                  | n.d.             | 3.508±<br>0.246  | n.d.                           | n.d.                             | 0.507±<br>0.015            | 0.613±<br>0.012         | 0.643±<br>0.047   | 1.244±<br>0.085 | 0.325±<br>0.023 | n.d.                                | n.d.                    | 0.743±<br>0.057  | 0.917±<br>0.065 | 0.355±<br>0.031 | n.d.                 | 0.757±<br>0.067 |
| <i>Arenaria serpyllifolia</i> agg.                       | 0.955±<br>0.085  | 1.506±<br>0.043  | n.d.                           | n.d.                             | 0.308±<br>0.014            | 0.261±<br>0.01          | 0.37±<br>0.026    | 0.625±<br>0.013 | n.d.            | n.d.                                | n.d.                    | 0.842±<br>0.039  | 0.597±<br>0.014 | 0.303±<br>0.015 | 0.308±<br>0.023      | 0.768±<br>0.064 |
| <i>Bidens tripartita</i> L.                              | n.d.             | 1.765±<br>0.097  | n.d.                           | n.d.                             | 0.432±<br>0.024            | n.d.                    | 0.474±<br>0.022   | 1.016±<br>0.039 | n.d.            | n.d.                                | n.d.                    | 0.314±<br>0.032  | 1.69±<br>0.173  | 0.312±<br>0.02  | n.d.                 | 1.643±<br>0.106 |
| <i>Campanula trachelium</i> L.                           | n.d.             | 5.61±<br>0.298   | n.d.                           | n.d.                             | 0.321±<br>0.021            | 0.626±<br>0.031         | 0.349±<br>0.026   | 0.738±<br>0.097 | n.d.            | n.d.                                | n.d.                    | 0.874±<br>0.056  | n.d.            | n.d.            | 0.356±<br>0.023      | n.d.            |
| <i>Capsella bursa-pastoris</i> (L.)<br>Med.              | 15.545±<br>2.652 | 15.824±<br>0.804 | n.d.                           | n.d.                             | 15.393±<br>0.631           | 6.185±<br>0.274         | 25.251±<br>2.318  | 6.248±<br>0.29  | 0.273±<br>0.047 | n.d.                                | n.d.                    | 1.701±<br>0.153  | 1.554±<br>0.144 | 0.281±<br>0.051 | 1.11±<br>0.03        | 0.934±<br>0.066 |
| <i>Chenopodium album</i> L.                              | n.d.             | 5.217±<br>0.166  | n.d.                           | n.d.                             | 0.78±<br>0.02              | 0.657±<br>0.025         | 0.783±<br>0.145   | 4.017±<br>0.19  | 0.797±<br>0.023 | n.d.                                | n.d.                    | n.d.             | 1.777±<br>0.131 | 0.275±<br>0.03  | n.d.                 | 5.244±<br>0.093 |
| <i>Cichorium intybus</i> L.                              | n.d.             | 1.555±<br>0.083  | n.d.                           | n.d.                             | 7.785±<br>0.293            | n.d.                    | 13.954±<br>0.427  | 0.558±<br>0.051 | n.d.            | n.d.                                | 1.337±<br>0.126         | 0.235±<br>0.04   | 0.49±<br>0.046  | n.d.            | n.d.                 | 0.467±<br>0.061 |
| <i>Cirsium arvense</i> (L.) Scop.                        | 2.173±<br>0.195  | 3.213±<br>0.284  | n.d.                           | n.d.                             | 0.583±<br>0.045            | n.d.                    | 0.8±<br>0.04      | 0.487±<br>0.061 | 0.347±<br>0.038 | 0.427±<br>0.025                     | 1.49±<br>0.026          | 0.42±<br>0.017   | 0.44±<br>0.087  | 0.397±<br>0.042 | n.d.                 | 0.367±<br>0.023 |
| <i>Consolida regalis</i> S.F.Gray                        | 2.092±<br>0.102  | 5.879±<br>0.312  | n.d.                           | n.d.                             | 11.677±<br>0.52            | 3.832±<br>0.272         | 19.405±<br>0.69   | 4.273±<br>0.295 | 0.257±<br>0.04  | n.d.                                | 1.578±<br>0.076         | 23.069±<br>2.772 | 1.772±<br>0.093 | 0.277±<br>0.052 | 2.507±<br>0.13       | 1.174±<br>0.116 |
| <i>Crepis biennis</i> L.                                 | 15.122±<br>0.479 | 3.496±<br>0.546  | n.d.                           | 0.298±<br>0.028                  | 0.272±<br>0.029            | 0.283±<br>0.03          | 0.837±<br>0.085   | 0.843±<br>0.065 | n.d.            | 0.336±<br>0.033                     | n.d.                    | 1.347±<br>0.095  | 0.591±<br>0.069 | n.d.            | 0.378±<br>0.054      | n.d.            |
| <i>Descurainia sophia</i> (L.)<br>Prantl                 | n.d.             | 7.23±<br>0.284   | n.d.                           | n.d.                             | 0.358±<br>0.013            | 0.316±<br>0.007         | 0.435±<br>0.038   | 1.161±<br>0.105 | 0.307±<br>0.011 | n.d.                                | n.d.                    | n.d.             | 2.485±<br>0.152 | 0.324±<br>0.027 | n.d.                 | 1.193±<br>0.046 |
| <i>Fumaria officinalis</i> L.                            | n.d.             | 1.24±<br>1.085   | n.d.                           | n.d.                             | 0.25±<br>0.303             | 0.24±<br>0.243          | 0.65±<br>0.647    | 0.62±<br>0.605  | 0.28±<br>0.282  | n.d.                                | n.d.                    | 1.29±<br>1.297   | 0.76±<br>0.767  | n.d.            | n.d.                 | 0.65±<br>0.625  |
| <i>Galinsoga parviflora</i> Cav.                         | n.d.             | 1.403±<br>0.284  | n.d.                           | n.d.                             | 0.564±<br>0.074            | 0.376±<br>0.029         | 0.7±<br>0.019     | 1.911±<br>0.116 | 0.311±<br>0.001 | n.d.                                | n.d.                    | 1.331±<br>0.042  | 1.891±<br>0.046 | n.d.            | 1.08±<br>0.207       | 1.713±<br>0.047 |
| <i>Galium aparine</i> L.                                 | n.d.             | 4.025±<br>0.157  | n.d.                           | n.d.                             | 0.349±<br>0.026            | n.d.                    | 0.623±<br>0.006   | 1.723±<br>0.172 | 0.293±<br>0.011 | n.d.                                | n.d.                    | n.d.             | n.d.            | 0.303±<br>0.006 | n.d.                 | 1.603±<br>0.068 |
| <i>Lapsana communis</i> L.                               | n.d.             | 2.303±<br>0.042  | 0.307±<br>0.006                | 0.309±<br>0.027                  | n.d.                       | n.d.                    | 0.431±<br>0.095   | 1.066±<br>0.087 | 0.282±<br>0.014 | 0.316±<br>0.01                      | n.d.                    | n.d.             | 0.746±<br>0.027 | n.d.            | n.d.                 | 0.612±<br>0.014 |
| <i>Leonurus cardiaca</i> L.                              | n.d.             | 9.47±<br>9.685   | n.d.                           | n.d.                             | 1.32±<br>1.372             | 1.6±<br>1.609           | n.d.              | 1.65±<br>1.697  | n.d.            | n.d.                                | n.d.                    | 1.18±<br>1.223   | 1.76±<br>1.812  | 1.43±<br>1.453  | 1.76±<br>1.794       | 2.63±<br>2.531  |
| <i>Lepidium ruderales</i> L.                             | n.d.             | 4.533±<br>0.246  | n.d.                           | n.d.                             | 5.643±<br>0.235            | 2.369±<br>0.236         | 8.356±<br>0.084   | 2.039±<br>0.138 | n.d.            | n.d.                                | n.d.                    | 1.266±<br>0.207  | 0.611±<br>0.149 | 0.437±<br>0.084 | 0.863±<br>0.125      | 0.6±<br>0.172   |
| <i>Melilotus albus</i> Med.                              | n.d.             | 1.515±<br>0.071  | n.d.                           | n.d.                             | 0.303±<br>0.006            | 0.33±<br>0.009          | 0.308±<br>0.033   | 1.677±<br>0.045 | 0.302±<br>0.014 | n.d.                                | n.d.                    | n.d.             | 0.78±<br>0.02   | 0.315±<br>0.018 | n.d.                 | 0.594±<br>0.054 |
| <i>Potentilla argentea</i> L.                            | n.d.             | 3.065±<br>0.094  | n.d.                           | n.d.                             | n.d.                       | 0.363±<br>0.029         | 0.495±<br>0.032   | 2.314±<br>0.177 | n.d.            | n.d.                                | n.d.                    | 0.276±<br>0.025  | 2.009±<br>0.136 | 0.306±<br>0.011 | n.d.                 | 1.776±<br>0.07  |
| <i>Silene latifolia alba</i> (Mill.)<br>Greut. et Burdet | n.d.             | 1.142±<br>0.183  | n.d.                           | n.d.                             | 0.303±<br>0.006            | 0.733±<br>0.129         | 0.723±<br>0.038   | 0.645±<br>0.043 | n.d.            | n.d.                                | n.d.                    | n.d.             | 0.841±<br>0.244 | 0.386±<br>0.062 | n.d.                 | 0.513±<br>0.094 |
| <i>Sisymbrium loeselii</i> L.                            | n.d.             | 1.142±<br>0.183  | n.d.                           | n.d.                             | 0.618±<br>0.037            | 0.733±<br>0.129         | 0.822±<br>0.035   | 0.645±<br>0.043 | n.d.            | n.d.                                | n.d.                    | n.d.             | 0.841±<br>0.244 | 0.386±<br>0.062 | n.d.                 | 0.513±<br>0.094 |
| <i>Stellaria media</i> (L.) Vill.                        | n.d.             | 1.326±<br>0.061  | n.d.                           | n.d.                             | 0.331±<br>0.011            | 0.68±<br>0.104          | 0.803±<br>0.1     | 0.639±<br>0.037 | n.d.            | 0.327±<br>0.03                      | n.d.                    | 0.917±<br>0.025  | 0.61±<br>0.041  | 0.338±<br>0.036 | n.d.                 | 0.612±<br>0.003 |
| <i>Taraxacum officinale</i> agg.                         | n.d.             | 3.426±<br>0.36   | n.d.                           | n.d.                             | 0.473±<br>0.025            | n.d.                    | 0.469±<br>0.04    | 1.787±<br>0.179 | 0.32±<br>0.026  | n.d.                                | n.d.                    | n.d.             | 1.788±<br>0.121 | 0.342±<br>0.007 | 0.394±<br>0.01       | n.d.            |
| <i>Thlapsi arvense</i> L.                                | n.d.             | 1.481±<br>0.126  | n.d.                           | n.d.                             | 8.432±<br>0.88             | 4.121±<br>0.198         | 14.946±<br>0.642  | 1.092±<br>0.132 | n.d.            | n.d.                                | 58.753±<br>1.39         | 64.2±<br>3.304   | 0.745±<br>0.043 | 0.31±<br>0.018  | 5.261±<br>0.539      | 0.618±<br>0.077 |
| <i>Tripleurospermum inodorum</i> (L.)<br>Schultz-Bip.    | n.d.             | 2.88±<br>0.176   | n.d.                           | n.d.                             | 0.371±<br>0.018            | 0.321±<br>0.018         | 0.637±<br>0.061   | 1.567±<br>0.047 | 0.302±<br>0.007 | n.d.                                | n.d.                    | n.d.             | 1.28±<br>0.061  | n.d.            | 0.348±<br>0.017      | n.d.            |
| <i>Urtica dioica</i> L.                                  | n.d.             | 0.999±<br>0.064  | n.d.                           | n.d.                             | 0.825±<br>0.052            | 0.791±<br>0.037         | 0.402±<br>0.013   | 2.691±<br>0.136 | n.d.            | n.d.                                | n.d.                    | 0.788±<br>0.008  | 1.695±<br>0.135 | n.d.            | n.d.                 | 1.635±<br>0.026 |
| <i>Viola arvensis</i> Murray                             | n.d.             | 3.1±<br>0.174    | n.d.                           | n.d.                             | 0.323±<br>0.012            | 0.697±<br>0.015         | 0.516±<br>0.031   | 1.493±<br>0.04  | n.d.            | n.d.                                | n.d.                    | n.d.             | 1.617±<br>0.035 | n.d.            | n.d.                 | 0.605±<br>0.018 |

**Appendix S1: Table 4.** The amount of fatty acids found on the seed surface. The fatty acids were isolated and derivatized into corresponding volatile methyl esters and then quantified via GC-MS method. The highest content of all surface fatty acids was found on the seeds of *C. arvense* (114.12±3.21 mg/g<sub>DW</sub>). Other species had significantly lower content of surface fatty acids. The lowest amount of all surface fatty acids (6.07±0.32 mg/g<sub>DW</sub>) was found on the seeds of *A. retroflexus*.

| Species                                                  | Butanoic | Hexanoic | Octanoic | Decanoic | Undecanoic | Dodecanoic | Tridecanoic | Myristoleic     | Tetradecanoic   | cis-10-Pentadecanoic | Pentadecanoic   | Palmitoleic     | Hexadecanoic    | cis-10-Heptadecenoic | Heptadecanoic   | gamma - Linolenic | Linoleic         | cis-Oleic        | Linolealitic     |
|----------------------------------------------------------|----------|----------|----------|----------|------------|------------|-------------|-----------------|-----------------|----------------------|-----------------|-----------------|-----------------|----------------------|-----------------|-------------------|------------------|------------------|------------------|
| <i>Amaranthus retroflexus</i> L.                         | n.d.     | n.d.     | n.d.     | n.d.     | n.d.       | n.d.       | n.d.        | n.d.            | n.d.            | n.d.                 | n.d.            | n.d.            | 1.591±<br>0.063 | n.d.                 | n.d.            | n.d.              | 0.771±<br>0.093  | 1.166±<br>0.077  | n.d.             |
| <i>Arctium lappa</i> L.                                  | n.d.     | n.d.     | n.d.     | n.d.     | n.d.       | n.d.       | n.d.        | n.d.            | n.d.            | n.d.                 | 0.58±<br>0.034  | n.d.            | 1.49±<br>0.04   | n.d.                 | n.d.            | n.d.              | 0.672±<br>0.026  | 1.219±<br>0.126  | 0.537±<br>0.098  |
| <i>Arenaria serpyllifolia</i> agg.                       | n.d.     | n.d.     | n.d.     | n.d.     | n.d.       | n.d.       | n.d.        | n.d.            | n.d.            | n.d.                 | 0.612±<br>0.01  | n.d.            | 1.589±<br>0.03  | n.d.                 | n.d.            | n.d.              | 0.698±<br>0.042  | 1.201±<br>0.103  | n.d.             |
| <i>Bidens tripartita</i> L.                              | n.d.     | n.d.     | n.d.     | n.d.     | n.d.       | n.d.       | n.d.        | 0.603±<br>0.025 | n.d.            | n.d.                 | 0.34±<br>0.01   | n.d.            | 1.751±<br>0.082 | n.d.                 | n.d.            | n.d.              | 1.038±<br>0.078  | 1.366±<br>0.166  | 0.607±<br>0.03   |
| <i>Campanula trachelium</i> L.                           | n.d.     | n.d.     | n.d.     | n.d.     | n.d.       | n.d.       | n.d.        | n.d.            | 0.493±<br>0.042 | n.d.                 | n.d.            | n.d.            | 1.613±<br>0.035 | n.d.                 | n.d.            | n.d.              | 1.592±<br>0.145  | 1.286±<br>0.108  | 0.643±<br>0.091  |
| <i>Capsella bursa-pastoris</i> (L.)<br>Med.              | n.d.     | n.d.     | n.d.     | n.d.     | n.d.       | n.d.       | n.d.        | 0.676±<br>0.042 | 1.078±<br>0.05  | n.d.                 | n.d.            | 0.645±<br>0.048 | 1.611±<br>0.146 | 0.595±<br>0.037      | n.d.            | n.d.              | 1.157±<br>0.096  | 1.362±<br>0.049  | n.d.             |
| <i>Chenopodium album</i> L.                              | n.d.     | n.d.     | n.d.     | n.d.     | n.d.       | n.d.       | n.d.        | n.d.            | 1.261±<br>0.102 | n.d.                 | 0.614±<br>0.043 | 9.89±<br>0.656  | 9.04±<br>0.338  | n.d.                 | 0.801±<br>0.093 | n.d.              | 45.833±<br>1.652 | 23.635±<br>1.118 | 8.057±<br>0.633  |
| <i>Cichorium intybus</i> L.                              | n.d.     | n.d.     | n.d.     | n.d.     | n.d.       | n.d.       | n.d.        | n.d.            | n.d.            | 0.604±<br>0.014      | n.d.            | 0.591±<br>0.01  | 1.615±<br>0.039 | n.d.                 | n.d.            | 0.672±<br>0.025   | 0.649±<br>0.019  | 1.2±<br>0.046    | n.d.             |
| <i>Cirsium arvense</i> (L.) Scop.                        | n.d.     | n.d.     | n.d.     | n.d.     | n.d.       | n.d.       | n.d.        | 0.57±<br>0.044  | 1.137±<br>0.095 | n.d.                 | n.d.            | n.d.            | 1.351±<br>0.529 | n.d.                 | n.d.            | 0.694±<br>0.01    | 0.699±<br>0.019  | 1.202±<br>0.089  | 0.5±<br>0.02     |
| <i>Consolida regalis</i> S.F.Gray                        | n.d.     | n.d.     | n.d.     | n.d.     | n.d.       | n.d.       | n.d.        | n.d.            | n.d.            | n.d.                 | n.d.            | n.d.            | 0.621±<br>0.026 | 1.637±<br>0.029      | n.d.            | n.d.              | 0.639±<br>0.054  | 0.782±<br>0.069  | 1.22±<br>0.095   |
| <i>Crepis biennis</i> L.                                 | n.d.     | n.d.     | n.d.     | n.d.     | n.d.       | n.d.       | n.d.        | n.d.            | 0.556±<br>0.079 | 0.077±<br>0.006      | 0.233±<br>0.015 | 0.588±<br>0.105 | 2.831±<br>0.172 | 2.495±<br>0.23       | 0.22±<br>0.017  | n.d.              | n.d.             | 22.943±<br>1.374 | 15.641±<br>1.644 |
| <i>Descurainia sophia</i> (L.) Prantl                    | n.d.     | n.d.     | n.d.     | n.d.     | n.d.       | n.d.       | n.d.        | n.d.            | n.d.            | n.d.                 | n.d.            | n.d.            | 2.459±<br>0.087 | n.d.                 | 0.707±<br>0.006 | n.d.              | 8.825±<br>0.266  | 1.796±<br>0.304  | 0.758±<br>0.113  |
| <i>Fumaria officinalis</i> L.                            | n.d.     | n.d.     | n.d.     | n.d.     | n.d.       | n.d.       | n.d.        | n.d.            | 0.607±<br>0.012 | n.d.                 | n.d.            | 0.561±<br>0.037 | 0.591±<br>0.012 | 1.566±<br>0.03       | 0.611±<br>0.012 | n.d.              | n.d.             | 0.701±<br>0.018  | 1.218±<br>0.1    |
| <i>Galinsoga parviflora</i> Cav.                         | n.d.     | n.d.     | n.d.     | n.d.     | n.d.       | n.d.       | n.d.        | n.d.            | n.d.            | n.d.                 | n.d.            | n.d.            | 1.797±<br>0.162 | n.d.                 | n.d.            | n.d.              | 1.022±<br>0.085  | 1.29±<br>0.036   | 0.567±<br>0.031  |
| <i>Galium aparine</i> L.                                 | n.d.     | n.d.     | n.d.     | n.d.     | n.d.       | n.d.       | n.d.        | n.d.            | 0.898±<br>0.076 | 0.633±<br>0.048      | 0.596±<br>0.016 | 0.637±<br>0.021 | 2.147±<br>0.065 | n.d.                 | 0.612±<br>0.003 | n.d.              | 13.788±<br>0.958 | 2.445±<br>0.258  | 0.804±<br>0.075  |
| <i>Lapsana communis</i> L.                               | n.d.     | n.d.     | n.d.     | n.d.     | n.d.       | n.d.       | n.d.        | n.d.            | n.d.            | n.d.                 | 0.594±<br>0.007 | n.d.            | 1.601±<br>0.02  | n.d.                 | n.d.            | n.d.              | 0.801±<br>0.05   | 1.076±<br>0.116  | 0.517±<br>0.02   |
| <i>Leonurus cardiaca</i> L.                              | n.d.     | n.d.     | n.d.     | n.d.     | n.d.       | n.d.       | n.d.        | n.d.            | 0.66±<br>0.61   | n.d.                 | n.d.            | 0.58±<br>0.585  | 0.61±<br>0.602  | 1.54±<br>1.576       | n.d.            | n.d.              | n.d.             | 2.56±<br>2.817   | 1.77±<br>1.862   |
| <i>Lepidium ruderales</i> L.                             | n.d.     | n.d.     | n.d.     | n.d.     | n.d.       | n.d.       | n.d.        | n.d.            | n.d.            | n.d.                 | 0.315±<br>0.015 | n.d.            | 0.733±<br>0.038 | n.d.                 | 0.572±<br>0.057 | n.d.              | 2.462±<br>0.278  | 1.347±<br>0.101  | 1.929±<br>0.146  |
| <i>Melilotus albus</i> Med.                              | n.d.     | n.d.     | n.d.     | n.d.     | n.d.       | n.d.       | n.d.        | n.d.            | n.d.            | n.d.                 | n.d.            | n.d.            | 1.662±<br>0.073 | n.d.                 | n.d.            | n.d.              | 0.764±<br>0.049  | 1.187±<br>0.068  | n.d.             |
| <i>Potentilla argentea</i> L.                            | n.d.     | n.d.     | n.d.     | n.d.     | n.d.       | n.d.       | n.d.        | n.d.            | n.d.            | n.d.                 | n.d.            | n.d.            | 1.711±<br>0.065 | n.d.                 | n.d.            | n.d.              | 1.18±<br>0.04    | 1.569±<br>0.114  | 0.659±<br>0.031  |
| <i>Silene latifolia alba</i> (Mill.)<br>Greut. et Burdet | n.d.     | n.d.     | n.d.     | n.d.     | n.d.       | n.d.       | n.d.        | n.d.            | 0.563±<br>0.015 | n.d.                 | 0.54±<br>0.041  | n.d.            | n.d.            | 1.478±<br>0.111      | n.d.            | n.d.              | 0.685±<br>0.033  | 0.66±<br>0.061   | n.d.             |
| <i>Sisymbrium loeselii</i> L.                            | n.d.     | n.d.     | n.d.     | n.d.     | n.d.       | n.d.       | n.d.        | n.d.            | 0.674±<br>0.021 | n.d.                 | 0.54±<br>0.041  | n.d.            | n.d.            | 2.478±<br>0.111      | n.d.            | n.d.              | 0.951±<br>0.03   | 0.66±<br>0.061   | 2.199±<br>0.105  |
| <i>Stellaria media</i> (L.) Vill.                        | n.d.     | n.d.     | n.d.     | n.d.     | n.d.       | n.d.       | n.d.        | 0.613±<br>0.006 | 1.157±<br>0.145 | n.d.                 | n.d.            | n.d.            | 1.587±<br>0.09  | n.d.                 | n.d.            | 0.736±<br>0.065   | 0.795±<br>0.048  | 1.381±<br>0.153  | 0.565±<br>0.092  |
| <i>Taraxacum officinale</i> agg.                         | n.d.     | n.d.     | n.d.     | n.d.     | n.d.       | n.d.       | n.d.        | n.d.            | n.d.            | n.d.                 | n.d.            | 0.711±<br>0.074 | 1.407±<br>0.271 | n.d.                 | n.d.            | n.d.              | 1.421±<br>0.333  | 1.4±<br>0.044    | 0.598±<br>0.076  |
| <i>Thlapsi arvense</i> L.                                | n.d.     | n.d.     | n.d.     | n.d.     | n.d.       | n.d.       | n.d.        | n.d.            | n.d.            | n.d.                 | 0.597±<br>0.005 | n.d.            | 1.49±<br>0.099  | n.d.                 | n.d.            | n.d.              | 0.719±<br>0.046  | n.d.             | 0.48±<br>0.046   |
| <i>Tripleurospermum inodorum</i><br>(L.) Schu.-Bip.      | n.d.     | n.d.     | n.d.     | n.d.     | n.d.       | n.d.       | n.d.        | n.d.            | 1.081±<br>0.062 | n.d.                 | n.d.            | 0.617±<br>0.016 | 1.638±<br>0.17  | n.d.                 | n.d.            | n.d.              | 1.245±<br>0.073  | 1.409±<br>0.175  | n.d.             |
| <i>Urtica dioica</i> L.                                  | n.d.     | n.d.     | n.d.     | n.d.     | n.d.       | n.d.       | n.d.        | n.d.            | 1.339±<br>0.287 | n.d.                 | n.d.            | n.d.            | 2.511±<br>0.171 | n.d.                 | n.d.            | n.d.              | 22.325±<br>0.813 | 3.264±<br>0.265  | 1.065±<br>0.075  |
| <i>Viola arvensis</i> Murray                             | n.d.     | n.d.     | n.d.     | n.d.     | n.d.       | n.d.       | n.d.        | n.d.            | 1.091±<br>0.036 | n.d.                 | n.d.            | n.d.            | 6.255±<br>0.083 | 0.707±<br>0.035      | 0.739±<br>0.035 | n.d.              | 6.079±<br>0.201  | 4.59±<br>0.131   | 1.727±<br>0.129  |



Appendix S1: Table 4. (Continued)

| Species                                               | trans-Elaidic   | Stearic         | cis-5,8,11,14-Eicosatetraenoic | cis-5,8,11,14,17-Eicosapentaenoic | cis-8,11,14-Eicosatrienoic | cis-11,14-Eicosadienoic | cis-11-Eicosenoic | Eicosanoic      | Heneicosanoic   | cis-4,7,10,13,16,19-Docosahexaenoic | cis-13,16-Docosadienoic | Erucic          | Docosanoic      | Tricosanoic    | cis-15-Tetracosenoic | Tetracosanoic   |
|-------------------------------------------------------|-----------------|-----------------|--------------------------------|-----------------------------------|----------------------------|-------------------------|-------------------|-----------------|-----------------|-------------------------------------|-------------------------|-----------------|-----------------|----------------|----------------------|-----------------|
| <i>Amaranthus retroflexus</i> L.                      | n.d.            | 1.165±<br>0.091 | n.d.                           | n.d.                              | n.d.                       | n.d.                    | 0.632±<br>0.025   | n.d.            | n.d.            | n.d.                                | n.d.                    | 0.741±<br>0.03  | n.d.            | n.d.           | n.d.                 | n.d.            |
| <i>Arctium lappa</i> L.                               | n.d.            | 1.184±<br>0.054 | n.d.                           | n.d.                              | n.d.                       | 0.599±<br>0.028         | 0.556±<br>0.01    | n.d.            | n.d.            | n.d.                                | n.d.                    | 0.716±<br>0.027 | n.d.            | n.d.           | n.d.                 | n.d.            |
| <i>Arenaria serpyllifolia</i> agg.                    | n.d.            | 1.113±<br>0.049 | n.d.                           | n.d.                              | n.d.                       | n.d.                    | 0.599±<br>0.018   | n.d.            | n.d.            | n.d.                                | n.d.                    | 0.751±<br>0.044 | n.d.            | n.d.           | n.d.                 | n.d.            |
| <i>Bidens tripartita</i> L.                           | n.d.            | 1.287±<br>0.068 | n.d.                           | n.d.                              | n.d.                       | n.d.                    | 0.546±<br>0.095   | n.d.            | n.d.            | n.d.                                | n.d.                    | 0.255±<br>0.005 | 1.406±<br>0.117 | n.d.           | n.d.                 | 1.41±<br>0.061  |
| <i>Campanula trachelium</i> L.                        | n.d.            | 1.272±<br>0.052 | n.d.                           | n.d.                              | n.d.                       | 0.6±<br>0.01            | n.d.              | n.d.            | n.d.            | n.d.                                | n.d.                    | 0.674±<br>0.031 | n.d.            | n.d.           | n.d.                 | n.d.            |
| <i>Capsella bursa-pastoris</i> (L.) Med.              | n.d.            | 1.348±<br>0.011 | n.d.                           | n.d.                              | 0.772±<br>0.023            | 0.62±<br>0.03           | 0.622±<br>0.039   | 1.292±<br>0.024 | n.d.            | n.d.                                | n.d.                    | 0.77±<br>0.044  | 1.23±<br>0.05   | n.d.           | n.d.                 | n.d.            |
| <i>Chenopodium album</i> L.                           | n.d.            | 5.107±<br>0.117 | n.d.                           | n.d.                              | 0.721±<br>0.063            | 0.609±<br>0.008         | 0.734±<br>0.041   | 3.208±<br>0.109 | 0.706±<br>0.005 | n.d.                                | n.d.                    | n.d.            | 1.687±<br>0.083 | n.d.           | 0.811±<br>0.072      | 1.404±<br>0.048 |
| <i>Cichorium intybus</i> L.                           | n.d.            | 1.252±<br>0.063 | n.d.                           | n.d.                              | n.d.                       | n.d.                    | 0.577±<br>0.025   | n.d.            | n.d.            | n.d.                                | 1.185±<br>0.117         | 0.719±<br>0.076 | n.d.            | n.d.           | n.d.                 | n.d.            |
| <i>Cirsium arvense</i> (L.) Scop                      | n.d.            | 1.306±<br>0.043 | n.d.                           | n.d.                              | n.d.                       | n.d.                    | 0.585±<br>0.031   | 1.202±<br>0.083 | n.d.            | n.d.                                | 1.163±<br>0.045         | 0.691±<br>0.047 | 1.134±<br>0.162 | n.d.           | n.d.                 | 1.291±<br>0.057 |
| <i>Consolida regalis</i> S.F.Gray                     | n.d.            | 1.334±<br>0.179 | n.d.                           | n.d.                              | n.d.                       | n.d.                    | 0.613±<br>0.04    | 0.603±<br>0.014 | n.d.            | n.d.                                | n.d.                    | 1.155±<br>0.075 | 0.653±<br>0.084 | n.d.           | n.d.                 | n.d.            |
| <i>Crepis biennis</i> L.                              | 4.536±<br>0.377 | 2.529±<br>0.215 | n.d.                           | 0.19±<br>0.02                     | 0.213±<br>0.021            | n.d.                    | 0.576±<br>0.056   | 0.612±<br>0.04  | n.d.            | n.d.                                | n.d.                    | 1.072±<br>0.117 | 0.597±<br>0.152 | n.d.           | n.d.                 | n.d.            |
| <i>Descurainia sophia</i> (L.) Prantl                 | n.d.            | 1.585±<br>0.056 | n.d.                           | n.d.                              | n.d.                       | 0.652±<br>0.007         | n.d.              | 1.257±<br>0.127 | n.d.            | n.d.                                | n.d.                    | n.d.            | 1.517±<br>0.025 | n.d.           | n.d.                 | n.d.            |
| <i>Fumaria officinalis</i> L.                         | 0.496±<br>0.015 | n.d.            | n.d.                           | n.d.                              | n.d.                       | n.d.                    | 0.624±<br>0.034   | 0.586±<br>0.02  | n.d.            | n.d.                                | n.d.                    | 1.27±<br>0.158  | 0.683±<br>0.035 | n.d.           | n.d.                 | n.d.            |
| <i>Galinsoga parviflora</i> Cav.                      | n.d.            | 1.198±<br>0.152 | n.d.                           | n.d.                              | n.d.                       | n.d.                    | n.d.              | 1.243±<br>0.093 | n.d.            | n.d.                                | n.d.                    | 0.733±<br>0.035 | 1.297±<br>0.032 | n.d.           | 0.909±<br>0.038      | 1.347±<br>0.095 |
| <i>Galium aparine</i> L.                              | n.d.            | 1.705±<br>0.031 | n.d.                           | n.d.                              | n.d.                       | n.d.                    | 0.605±<br>0.018   | 1.213±<br>0.064 | n.d.            | n.d.                                | n.d.                    | n.d.            | n.d.            | n.d.           | n.d.                 | 1.441±<br>0.182 |
| <i>Lapsana communis</i> L.                            | n.d.            | 1.199±<br>0.063 | n.d.                           | n.d.                              | n.d.                       | n.d.                    | n.d.              | n.d.            | n.d.            | n.d.                                | n.d.                    | n.d.            | 0.62±<br>0.03   | n.d.           | n.d.                 | n.d.            |
| <i>Leonurus cardiaca</i> L.                           | n.d.            | 1.52±<br>1.451  | n.d.                           | n.d.                              | n.d.                       | 0.7±<br>0.722           | 0.6±<br>0.604     | 0.55±<br>0.571  | 1.19±<br>1.179  | n.d.                                | n.d.                    | 1.1±<br>1.083   | 0.68±<br>0.671  | 1.25±<br>1.224 | n.d.                 | n.d.            |
| <i>Lepidium ruderales</i> L.                          | n.d.            | 1.008±<br>0.076 | n.d.                           | n.d.                              | n.d.                       | 0.687±<br>0.055         | 0.714±<br>0.07    | 0.627±<br>0.016 | n.d.            | n.d.                                | n.d.                    | 1.112±<br>0.089 | 0.35±<br>0.036  | 0.28±<br>0.01  | n.d.                 | n.d.            |
| <i>Melilotus albus</i> Med.                           | n.d.            | 1.257±<br>0.056 | n.d.                           | n.d.                              | n.d.                       | n.d.                    | n.d.              | 1.181±<br>0.057 | n.d.            | n.d.                                | n.d.                    | n.d.            | 0.727±<br>0.04  | n.d.           | n.d.                 | n.d.            |
| <i>Potentilla argentea</i> L.                         | n.d.            | 1.245±<br>0.052 | n.d.                           | n.d.                              | n.d.                       | 0.367±<br>0.032         | n.d.              | 1.393±<br>0.225 | n.d.            | n.d.                                | n.d.                    | n.d.            | 1.456±<br>0.095 | n.d.           | n.d.                 | 1.436±<br>0.251 |
| <i>Silene latifolia alba</i> (Mill.) Greut. et Burdet | n.d.            | 1.194±<br>0.04  | n.d.                           | n.d.                              | n.d.                       | 0.713±<br>0.006         | 0.631±<br>0.036   | 0.529±<br>0.055 | n.d.            | n.d.                                | n.d.                    | n.d.            | 0.718±<br>0.029 | n.d.           | n.d.                 | n.d.            |
| <i>Sisymbrium loeselii</i> L.                         | n.d.            | 1.194±<br>0.04  | n.d.                           | n.d.                              | n.d.                       | 0.713±<br>0.006         | 0.631±<br>0.036   | 0.4±<br>0.023   | n.d.            | n.d.                                | n.d.                    | n.d.            | 0.718±<br>0.029 | n.d.           | n.d.                 | n.d.            |
| <i>Stellaria media</i> (L.) Vill.                     | n.d.            | 1.186±<br>0.032 | n.d.                           | n.d.                              | n.d.                       | 0.58±<br>0.034          | 0.647±<br>0.025   | n.d.            | n.d.            | n.d.                                | n.d.                    | 0.751±<br>0.019 | n.d.            | n.d.           | n.d.                 | n.d.            |
| <i>Taraxacum officinale</i> agg.                      | n.d.            | 1.233±<br>0.09  | n.d.                           | n.d.                              | n.d.                       | n.d.                    | n.d.              | 0.6±<br>0.02    | n.d.            | n.d.                                | n.d.                    | n.d.            | 1.415±<br>0.196 | n.d.           | 0.27±<br>0.026       | n.d.            |
| <i>Thlapsi arvense</i> L.                             | n.d.            | 1.131±<br>0.057 | n.d.                           | n.d.                              | n.d.                       | 0.658±<br>0.037         | n.d.              | n.d.            | n.d.            | n.d.                                | 1.343±<br>0.205         | 0.766±<br>0.068 | n.d.            | n.d.           | n.d.                 | n.d.            |
| <i>Tripleurospermum inodorum</i> (L.) Schu.-Bip.      | n.d.            | 1.285±<br>0.057 | n.d.                           | n.d.                              | n.d.                       | n.d.                    | 0.592±<br>0.044   | 1.185±<br>0.135 | n.d.            | n.d.                                | n.d.                    | n.d.            | 1.279±<br>0.06  | n.d.           | n.d.                 | n.d.            |
| <i>Urtica dioica</i> L.                               | n.d.            | 0.65±<br>0.052  | n.d.                           | n.d.                              | 0.74±<br>0.036             | 0.686±<br>0.012         | n.d.              | 1.587±<br>0.055 | 0.732±<br>0.014 | n.d.                                | n.d.                    | 0.732±<br>0.02  | 1.584±<br>0.177 | n.d.           | n.d.                 | 1.522±<br>0.124 |
| <i>Viola arvensis</i> Murray                          | n.d.            | 2.453±<br>0.126 | n.d.                           | n.d.                              | n.d.                       | 0.605±<br>0.062         | n.d.              | 1.274±<br>0.041 | n.d.            | n.d.                                | n.d.                    | n.d.            | 1.302±<br>0.065 | n.d.           | n.d.                 | n.d.            |

**Appendix S1:** Table 5. Volatiles from imbibed seeds. Volatile compounds released by seeds were after imbibition and consecutive incubation (24 hours in 25 °C.) into headspaces vials and detected by using common GCMS platform. The highest amount of volatile compound was found in seeds of *Sisymbrium loeselii* L. (4.83% of determined volatiles) and lowest in seeds of *Amaranthus retroflexus* L. (0.03 %).

| Species                                               | Acetaldehyde | Acetonitrile | Ethanol | Ethanthiol | Ethyl acetate | Chloroform | Methanol | Methylene chloride | n-Hexane | Propanol | Pyruvic acid | tert-Butanol |
|-------------------------------------------------------|--------------|--------------|---------|------------|---------------|------------|----------|--------------------|----------|----------|--------------|--------------|
| <i>Amaranthus retroflexus</i> L.                      | n.d.         | 0.03         | n.d.    | n.d.       | n.d.          | n.d.       | n.d.     | n.d.               | n.d.     | n.d.     | n.d.         | n.d.         |
| <i>Arctium lappa</i> L.                               | n.d.         | 0.05         | n.d.    | 0.12       | n.d.          | 0.05       | n.d.     | n.d.               | n.d.     | n.d.     | n.d.         | n.d.         |
| <i>Arenaria serpyllifolia</i> agg.                    | n.d.         | 0.76         | 1.81    | n.d.       | n.d.          | 0.05       | 0.31     | 0.09               | n.d.     | n.d.     | n.d.         | n.d.         |
| <i>Bidens tripartita</i> L.                           | n.d.         | 0.24         | n.d.    | n.d.       | n.d.          | 0.09       | n.d.     | 0.11               | n.d.     | n.d.     | n.d.         | n.d.         |
| <i>Campanula trachelium</i> L.                        | n.d.         | 0.06         | 0.04    | n.d.       | n.d.          | n.d.       | n.d.     | n.d.               | n.d.     | n.d.     | n.d.         | n.d.         |
| <i>Capsella bursa-pastoris</i> (L.) Med.              | n.d.         | 0.05         | 1.01    | 0.35       | n.d.          | n.d.       | n.d.     | n.d.               | n.d.     | 0.14     | n.d.         | n.d.         |
| <i>Chenopodium album</i> L.                           | n.d.         | 0.31         | 0.05    | n.d.       | n.d.          | 0.62       | n.d.     | n.d.               | n.d.     | n.d.     | n.d.         | 0.05         |
| <i>Cichorium intybus</i> L.                           | 0.23         | 0.35         | 1.05    | 0.16       | n.d.          | 0.17       | n.d.     | 0.08               | n.d.     | n.d.     | n.d.         | n.d.         |
| <i>Cirsium arvense</i> (L.) Scop.                     | n.d.         | 0.38         | 2.4     | n.d.       | n.d.          | n.d.       | 0.23     | 0.06               | n.d.     | n.d.     | n.d.         | n.d.         |
| <i>Consolida regalis</i> S.F.Gray                     | n.d.         | 0.17         | 0.67    | n.d.       | n.d.          | n.d.       | n.d.     | 0.03               | n.d.     | n.d.     | n.d.         | n.d.         |
| <i>Crepis biennis</i> L.                              | n.d.         | n.d.         | 0.83    | 0.04       | n.d.          | n.d.       | n.d.     | n.d.               | n.d.     | n.d.     | n.d.         | n.d.         |
| <i>Descurainia sophia</i> (L.) Prantl                 | n.d.         | 0.32         | n.d.    | 0.26       | n.d.          | 0.34       | n.d.     | 0.11               | n.d.     | n.d.     | n.d.         | n.d.         |
| <i>Fumaria officinalis</i> L.                         | n.d.         | 0.3          | 0.74    | 0.23       | n.d.          | n.d.       | n.d.     | n.d.               | n.d.     | n.d.     | n.d.         | n.d.         |
| <i>Galinsoga parviflora</i> Cav.                      | n.d.         | 0.2          | 0.05    | n.d.       | n.d.          | n.d.       | n.d.     | n.d.               | n.d.     | n.d.     | n.d.         | n.d.         |
| <i>Galium aparine</i> L.                              | n.d.         | n.d.         | 0.16    | n.d.       | n.d.          | 0.04       | n.d.     | n.d.               | n.d.     | n.d.     | n.d.         | n.d.         |
| <i>Lapsana communis</i> L.                            | n.d.         | 0.07         | 0.18    | 0.41       | n.d.          | 0.03       | n.d.     | n.d.               | n.d.     | n.d.     | n.d.         | n.d.         |
| <i>Leonurus cardiaca</i> L.                           | n.d.         | 0.33         | n.d.    | 0.07       | n.d.          | 0.07       | n.d.     | 0.07               | n.d.     | n.d.     | n.d.         | n.d.         |
| <i>Lepidium ruderalis</i> L.                          | n.d.         | 0.1          | 0.2     | n.d.       | n.d.          | 0.07       | n.d.     | 0.07               | n.d.     | n.d.     | n.d.         | n.d.         |
| <i>Melilotus albus</i> Med.                           | n.d.         | n.d.         | 0.77    | n.d.       | n.d.          | n.d.       | n.d.     | n.d.               | n.d.     | n.d.     | n.d.         | n.d.         |
| <i>Potentilla argentea</i> L.                         | n.d.         | 0.1          | n.d.    | n.d.       | n.d.          | 0.21       | n.d.     | 0.15               | n.d.     | n.d.     | n.d.         | n.d.         |
| <i>Silene latifolia alba</i> (Mill.) Greut. et Burdet | n.d.         | 0.41         | 1.8     | n.d.       | n.d.          | 0.28       | n.d.     | 0.09               | n.d.     | n.d.     | n.d.         | n.d.         |
| <i>Sisymbrium loeselii</i> L.                         | n.d.         | 1.02         | 0.35    | n.d.       | n.d.          | 0.04       | 0.11     | n.d.               | 0.13     | n.d.     | n.d.         | 3.18         |
| <i>Stellaria media</i> (L.) Vill.                     | n.d.         | 0.46         | 2.71    | 0.01       | n.d.          | 0.27       | n.d.     | n.d.               | n.d.     | n.d.     | n.d.         | n.d.         |
| <i>Taraxacum officinale</i> agg.                      | n.d.         | 0.29         | 1.42    | 0.27       | n.d.          | 0.23       | n.d.     | 0.06               | n.d.     | n.d.     | n.d.         | n.d.         |
| <i>Thlapsi arvense</i> L.                             | n.d.         | 0.07         | 0.07    | 0.07       | n.d.          | n.d.       | n.d.     | n.d.               | n.d.     | n.d.     | n.d.         | n.d.         |
| <i>Tripleurospermum inodorum</i> (L.) Schu.-Bip.      | n.d.         | 0.3          | 0.19    | n.d.       | n.d.          | 0.04       | n.d.     | 0.04               | n.d.     | n.d.     | n.d.         | n.d.         |
| <i>Urtica dioica</i> L.                               | n.d.         | 0.66         | 0.34    | 0.15       | n.d.          | 0.12       | n.d.     | 0.07               | n.d.     | n.d.     | n.d.         | n.d.         |
| <i>Viola arvensis</i> Murray                          | n.d.         | 0.29         | 2.44    | n.d.       | n.d.          | 0.21       | 0.21     | 0.13               | n.d.     | n.d.     | 0.03         | n.d.         |

**Appendix S1: Table 6.** Volatile compounds released from dry seeds into headspaces vials and detected by using common GCMS platform. The highest amount of volatile compounds were found in seeds of *Sisymbrium loeselii* L. (4.8 % of determined volatiles) and the lowest in seeds of *Amaranthus retroflexus* L., where any volatiles compounds were detected.

| Species                                               | Acetaldehyde | Acetonitrile | Ethanol | Ethanthiol | Chloroform | Methanol | Methylene chloride | n-Hexane | Propanol | Pyruvic acid | tert-Butanol |
|-------------------------------------------------------|--------------|--------------|---------|------------|------------|----------|--------------------|----------|----------|--------------|--------------|
| <i>Amaranthus retroflexus</i> L.                      | n.d.         | n.d.         | n.d.    | n.d.       | n.d.       | n.d.     | n.d.               | n.d.     | n.d.     | n.d.         | n.d.         |
| <i>Arctium lappa</i> L.                               | n.d.         | 0.1          | n.d.    | 0.1        | 0.1        | n.d.     | n.d.               | n.d.     | n.d.     | n.d.         | n.d.         |
| <i>Arenaria serpyllifolia</i> agg.                    | n.d.         | 0.8          | 1.8     | n.d.       | 0.1        | 0.3      | 0.1                | n.d.     | n.d.     | n.d.         | n.d.         |
| <i>Bidens tripartita</i> L.                           | n.d.         | 0.2          | n.d.    | n.d.       | 0.1        | n.d.     | 0.1                | n.d.     | n.d.     | n.d.         | n.d.         |
| <i>Campanula trachelium</i> L.                        | n.d.         | 0.1          | n.d.    | n.d.       | n.d.       | n.d.     | n.d.               | n.d.     | n.d.     | n.d.         | n.d.         |
| <i>Capsella bursa-pastoris</i> (L.) Med.              | n.d.         | 0.1          | 1       | 0.4        | n.d.       | n.d.     | n.d.               | n.d.     | 0.1      | n.d.         | n.d.         |
| <i>Chenopodium album</i> L.                           | n.d.         | 0.3          | 0.1     | n.d.       | 0.6        | n.d.     | n.d.               | n.d.     | n.d.     | n.d.         | 0.1          |
| <i>Cichorium intybus</i> L.                           | 0.2          | 0.4          | 1.1     | 0.2        | 0.2        | n.d.     | 0.1                | n.d.     | n.d.     | n.d.         | n.d.         |
| <i>Cirsium arvense</i> (L.) Scop.                     | n.d.         | 0.4          | 2.4     | n.d.       | n.d.       | 0.2      | 0.1                | n.d.     | n.d.     | n.d.         | n.d.         |
| <i>Consolida regalis</i> S.F.Gray                     | n.d.         | 0.2          | 0.7     | n.d.       | n.d.       | n.d.     | n.d.               | n.d.     | n.d.     | n.d.         | n.d.         |
| <i>Crepis biennis</i> L.                              | n.d.         | n.d.         | 0.8     | n.d.       | n.d.       | n.d.     | n.d.               | n.d.     | n.d.     | n.d.         | n.d.         |
| <i>Descurainia sophia</i> (L.) Prantl                 | n.d.         | 0.3          | n.d.    | 0.3        | 0.3        | n.d.     | 0.1                | n.d.     | n.d.     | n.d.         | n.d.         |
| <i>Fumaria officinalis</i> L.                         | n.d.         | 0.3          | 0.7     | 0.2        | n.d.       | n.d.     | n.d.               | n.d.     | n.d.     | n.d.         | n.d.         |
| <i>Galinsoga parviflora</i> Cav.                      | n.d.         | 0.2          | 0.1     | n.d.       | n.d.       | n.d.     | n.d.               | n.d.     | n.d.     | n.d.         | n.d.         |
| <i>Galium aparine</i> L.                              | n.d.         | n.d.         | 0.2     | n.d.       | n.d.       | n.d.     | n.d.               | n.d.     | n.d.     | n.d.         | n.d.         |
| <i>Lapsana communis</i> L.                            | n.d.         | 0.1          | 0.2     | 0.4        | n.d.       | n.d.     | n.d.               | n.d.     | n.d.     | n.d.         | n.d.         |
| <i>Leonurus cardiaca</i> L.                           | n.d.         | 0.3          | n.d.    | 0.1        | 0.1        | n.d.     | 0.1                | n.d.     | n.d.     | n.d.         | n.d.         |
| <i>Lepidium ruderale</i> L.                           | n.d.         | 0.1          | 0.2     | n.d.       | 0.1        | n.d.     | 0.1                | n.d.     | n.d.     | n.d.         | n.d.         |
| <i>Melilotus albus</i> Med.                           | n.d.         | n.d.         | 0.8     | n.d.       | n.d.       | n.d.     | n.d.               | n.d.     | n.d.     | n.d.         | n.d.         |
| <i>Potentilla argentea</i> L.                         | n.d.         | 0.1          | n.d.    | n.d.       | 0.2        | n.d.     | 0.2                | n.d.     | n.d.     | n.d.         | n.d.         |
| <i>Silene latifolia alba</i> (Mill.) Greut. et Burdet | n.d.         | 0.4          | 1.8     | n.d.       | 0.3        | n.d.     | 0.1                | n.d.     | n.d.     | n.d.         | n.d.         |
| <i>Sisymbrium loeselii</i> L.                         | n.d.         | 1            | 0.4     | n.d.       | n.d.       | 0.1      | n.d.               | 0.1      | n.d.     | n.d.         | 3.2          |
| <i>Stellaria media</i> (L.) Vill.                     | n.d.         | 0.5          | 2.7     | n.d.       | 0.3        | n.d.     | n.d.               | n.d.     | n.d.     | n.d.         | n.d.         |
| <i>Taraxacum officinale</i> agg.                      | n.d.         | 0.3          | 1.4     | 0.3        | 0.2        | n.d.     | 0.1                | n.d.     | n.d.     | n.d.         | n.d.         |
| <i>Thlapsi arvense</i> L.                             | n.d.         | 0.1          | 0.1     | 0.1        | n.d.       | n.d.     | n.d.               | n.d.     | n.d.     | n.d.         | n.d.         |
| <i>Tripleurospermum inodorum</i> (L.) Schultz-Bip.    | n.d.         | 0.3          | 0.2     | n.d.       | n.d.       | n.d.     | n.d.               | n.d.     | n.d.     | n.d.         | n.d.         |
| <i>Urtica dioica</i> L.                               | n.d.         | 0.7          | 0.3     | 0.2        | 0.1        | n.d.     | 0.1                | n.d.     | n.d.     | n.d.         | n.d.         |
| <i>Viola arvensis</i> Murray                          | n.d.         | 0.3          | 2.4     | n.d.       | 0.2        | 0.2      | 0.1                | n.d.     | n.d.     | n.d.         | n.d.         |

**Appendix S1: Table 7.** Other surface compounds. Other surface compounds were isolated from seeds by chloroform. After filtration, chloroform was evaporated under reduced pressure and isolated compounds were dissolved into n-hexane containing 0.1% n-undecane as internal standard for normalization of chromatographic conditions. The results were presented as percentage content of chloroform soluble surface compounds. The majority of surface compounds detected were long-chain alkanes, or their branched counterparts, with significant amounts of phytosterols, such as  $\gamma$ -sitosterol. The composition the surface compounds also varied between the species.

| Species                                               | n-Hexadecanoic acid | Ethyl linoleate | Linoleic acid | n-Tricosane | Butyl-9,12-octadecadienoate | n-Hexacosane | 1,9-n-Octylhexacosane | n-Octacosane | $\alpha$ -Glyceryl linoleate | n-Triacontane | n-Dotriacontane | Sterol | $\gamma$ -sitosterol | 1,2,4-Dimethoxyestra-1(10),2,4-triene-3,17-diol | Caprin | $\beta$ -Sitosterol | 11-n-Decyltracosane | Rubrosterone | Trilinolein |
|-------------------------------------------------------|---------------------|-----------------|---------------|-------------|-----------------------------|--------------|-----------------------|--------------|------------------------------|---------------|-----------------|--------|----------------------|-------------------------------------------------|--------|---------------------|---------------------|--------------|-------------|
| <i>Amaranthus retroflexus</i> L.                      | n.d.                | n.d.            | n.d.          | n.d.        | n.d.                        | n.d.         | n.d.                  | n.d.         | 10n.d.                       | n.d.          | n.d.            | n.d.   | n.d.                 | n.d.                                            | n.d.   | n.d.                | n.d.                | n.d.         | n.d.        |
| <i>Arctium lappa</i> L.                               | n.d.                | n.d.            | n.d.          | n.d.        | n.d.                        | n.d.         | n.d.                  | tr           | n.d.                         | 56.89±        | 43.07±          | n.d.   | n.d.                 | n.d.                                            | n.d.   | n.d.                | n.d.                | n.d.         | n.d.        |
| <i>Arenaria serpyllifolia</i> agg.                    | n.d.                | n.d.            | n.d.          | tr          | 0.14±                       | n.d.         | 7.85±                 | 23.62±       | n.d.                         | n.d.          | n.d.            | n.d.   | 34.11±               | n.d.                                            | n.d.   | n.d.                | 33.19±              | n.d.         | n.d.        |
| <i>Bidens tripartita</i> L.                           | n.d.                | n.d.            | n.d.          | n.d.        | n.d.                        | n.d.         | n.d.                  | tr           | n.d.                         | 10n.d.        | n.d.            | n.d.   | n.d.                 | n.d.                                            | n.d.   | n.d.                | n.d.                | n.d.         | n.d.        |
| <i>Campanula trachelium</i> L.                        | n.d.                | n.d.            | n.d.          | n.d.        | 65.98±                      | n.d.         | n.d.                  | n.d.         | n.d.                         | 33.99±        | n.d.            | n.d.   | n.d.                 | n.d.                                            | n.d.   | n.d.                | n.d.                | n.d.         | n.d.        |
| <i>Capsella bursa-pastoris</i> (L.) Med.              | n.d.                | n.d.            | n.d.          | n.d.        | 0.52                        | n.d.         | n.d.                  | tr           | n.d.                         | 61.66±        | n.d.            | n.d.   | n.d.                 | n.d.                                            | n.d.   | n.d.                | n.d.                | n.d.         | n.d.        |
| <i>Chenopodium album</i> L.                           | n.d.                | n.d.            | 1.24±         | n.d.        | 5.91±                       | n.d.         | 0.71±                 | n.d.         | n.d.                         | 1.85±         | n.d.            | n.d.   | n.d.                 | n.d.                                            | 76.18± | 10.14±              | n.d.                | n.d.         | n.d.        |
| <i>Cichorium intybus</i> L.                           | n.d.                | n.d.            | n.d.          | n.d.        | n.d.                        | n.d.         | n.d.                  | n.d.         | n.d.                         | n.d.          | n.d.            | 100±   | n.d.                 | n.d.                                            | n.d.   | n.d.                | n.d.                | 0±           | n.d.        |
| <i>Cirsium arvense</i> (L.) Scop                      | n.d.                | n.d.            | n.d.          | n.d.        | n.d.                        | n.d.         | n.d.                  | tr           | n.d.                         | tr            | n.d.            | n.d.   | n.d.                 | n.d.                                            | n.d.   | n.d.                | n.d.                | 38.14        | n.d.        |
| <i>Consolida regalis</i> S.F.Gray                     | n.d.                | n.d.            | n.d.          | n.d.        | n.d.                        | n.d.         | n.d.                  | n.d.         | n.d.                         | tr            | tr              | n.d.   | n.d.                 | n.d.                                            | n.d.   | n.d.                | n.d.                | n.d.         | n.d.        |
| <i>Crepis biennis</i> L.                              | 0.42±               | 1.41±           | 2.36±         | n.d.        | 7.54±                       | 1.46±        | 2.5±                  | 12.67±       | 3.17±                        | 44.1±         | n.d.            | n.d.   | 19.05±               | n.d.                                            | n.d.   | n.d.                | n.d.                | n.d.         | n.d.        |
| <i>Descurainia sophia</i> (L.) Prantl                 | n.d.                | n.d.            | n.d.          | n.d.        | 36.6±                       | n.d.         | tr                    | n.d.         | 23.48±                       | 14.67±        | 11.9±           | n.d.   | n.d.                 | n.d.                                            | n.d.   | n.d.                | n.d.                | n.d.         | n.d.        |
| <i>Fumaria officinalis</i> L.                         | n.d.                | n.d.            | n.d.          | n.d.        | 10n.d.                      | tr           | n.d.                  | n.d.         | n.d.                         | n.d.          | n.d.            | n.d.   | n.d.                 | n.d.                                            | n.d.   | n.d.                | n.d.                | n.d.         | n.d.        |
| <i>Galinsoga parviflora</i> Cav.                      | n.d.                | n.d.            | n.d.          | n.d.        | tr                          | n.d.         | n.d.                  | n.d.         | n.d.                         | 46.38±        | 39.99±          | n.d.   | n.d.                 | n.d.                                            | n.d.   | 9.43±               | n.d.                | n.d.         | n.d.        |
| <i>Galium aparine</i> L.                              | n.d.                | n.d.            | n.d.          | n.d.        | 10n.d.                      | n.d.         | tr                    | n.d.         | n.d.                         | n.d.          | n.d.            | n.d.   | n.d.                 | n.d.                                            | n.d.   | n.d.                | n.d.                | n.d.         | n.d.        |
| <i>Lapsana communis</i> L.                            | n.d.                | n.d.            | n.d.          | n.d.        | 40.4±                       | n.d.         | n.d.                  | n.d.         | n.d.                         | 21.42±        | 22.42±          | n.d.   | n.d.                 | n.d.                                            | n.d.   | 3.95±               | 10.71±              | 64.6±        | n.d.        |
| <i>Leonurus cardiaca</i> L.                           | n.d.                | n.d.            | n.d.          | n.d.        | 14.21±                      | n.d.         | n.d.                  | 2.56±        | 1.35±                        | 6.84±         | 9.47±           | n.d.   | n.d.                 | n.d.                                            | n.d.   | n.d.                | n.d.                | n.d.         | n.d.        |
| <i>Lepidium ruderalis</i> L.                          | n.d.                | n.d.            | n.d.          | n.d.        | 17.04±                      | n.d.         | n.d.                  | 3.47±        | n.d.                         | 26.31±        | 50.74±          | n.d.   | n.d.                 | n.d.                                            | n.d.   | n.d.                | n.d.                | n.d.         | n.d.        |
| <i>Melilotus albus</i> Med.                           | n.d.                | n.d.            | n.d.          | n.d.        | 49.68±                      | n.d.         | n.d.                  | n.d.         | n.d.                         | 50.24±        | n.d.            | n.d.   | n.d.                 | n.d.                                            | n.d.   | n.d.                | n.d.                | n.d.         | n.d.        |
| <i>Potentilla argentea</i> L.                         | n.d.                | n.d.            | n.d.          | n.d.        | n.d.                        | tr           | n.d.                  | n.d.         | n.d.                         | 36.63±        | 28.86±          | n.d.   | n.d.                 | n.d.                                            | n.d.   | n.d.                | n.d.                | 34.14±       | n.d.        |
| <i>Silene latifolia alba</i> (Mill.) Greut. et Burdet | n.d.                | n.d.            | n.d.          | n.d.        | n.d.                        | tr           | n.d.                  | tr           | n.d.                         | n.d.          | tr              | n.d.   | n.d.                 | n.d.                                            | n.d.   | n.d.                | n.d.                | n.d.         | n.d.        |
| <i>Sisymbrium loeselii</i> L.                         | n.d.                | n.d.            | n.d.          | n.d.        | n.d.                        | 2.73±        | n.d.                  | n.d.         | 10.79±                       | 62.85±        | n.d.            | n.d.   | n.d.                 | n.d.                                            | n.d.   | 4.37±               | n.d.                | n.d.         | n.d.        |
| <i>Stellaria media</i> (L.) Vill.                     | n.d.                | n.d.            | n.d.          | n.d.        | n.d.                        | tr           | n.d.                  | tr           | n.d.                         | n.d.          | tr              | n.d.   | n.d.                 | n.d.                                            | n.d.   | n.d.                | n.d.                | n.d.         | n.d.        |
| <i>Taraxacum officinale</i> agg.                      | n.d.                | n.d.            | n.d.          | n.d.        | n.d.                        | n.d.         | n.d.                  | n.d.         | n.d.                         | 15.16±        | n.d.            | n.d.   | n.d.                 | n.d.                                            | n.d.   | 64.56±              | n.d.                | 17.04±       | n.d.        |
| <i>Thlapsi arvense</i> L.                             | n.d.                | n.d.            | n.d.          | n.d.        | n.d.                        | n.d.         | n.d.                  | tr           | n.d.                         | 10n.d.        | n.d.            | n.d.   | n.d.                 | n.d.                                            | n.d.   | n.d.                | n.d.                | n.d.         | n.d.        |
| <i>Tripleurospermum inodorum</i> (L.) Schultz-Bip.    | n.d.                | n.d.            | n.d.          | n.d.        | n.d.                        | 7.37±        | n.d.                  | 14.17±       | 2.7±                         | 58.71±        | 13.39±          | n.d.   | n.d.                 | n.d.                                            | n.d.   | n.d.                | n.d.                | n.d.         | n.d.        |
| <i>Urtica dioica</i> L.                               | n.d.                | n.d.            | n.d.          | n.d.        | 17.96±                      | n.d.         | n.d.                  | n.d.         | n.d.                         | 18.21±        | 17.21±          | n.d.   | n.d.                 | n.d.                                            | n.d.   | 34.96±              | 4.15±               | 6.2±         | n.d.        |
| <i>Viola arvensis</i> Murray                          | n.d.                | n.d.            | n.d.          | 0.95        | 36.44±                      | 57.29±       | n.d.                  | n.d.         | n.d.                         | 0.25          | 0.28            | n.d.   | n.d.                 | n.d.                                            | n.d.   | 1.12                | 0.24                | 0.44         | n.d.        |
